# Supplementary material for: Synthesis of 2,5-bis(9H-fluoren-9-ylidene)-2,5-dihydrothiophene derivatives and a systematic study of the substituent effect
Source: Royal Society of Chemistry journal article supplement (doi:10.1039/d2nj00008c), 2022-01-01

*Supplementary information*

**Synthesis of 2,5-bis(9H-fluoren-9-ylidene)-2,5-dihydrothiophene derivatives and systematic study of the substituent effect**

Sijia He,<sup>a</sup> Hua Jiang,<sup>\*a</sup> Jinfang Cai,<sup>a,b</sup> Zhiqi Liu<sup>c</sup>

<sup>a</sup> Engineering Research Center for Eco-Dyeing and Finishing of Textiles, Ministry of Education, Zhejiang Sci-Tech University, Hangzhou, 310018, China

<sup>b</sup> Zhejiang Tongkun Institute of Advanced Materials, Jiaxing, 314500, China

<sup>c</sup> Hangzhou Yanqu Information Technology Co.Ltd. Hangzhou, 310003, China

\* Corresponding author. *E-mail address*: [jh@zstu.edu.cn](mailto:jh@zstu.edu.cn) (H. Jiang).

**Contents**

1. TG curves of **B1-B9**
2. Color of **ThBF** derivatives
3. Fluorescence spectra of **B1-B9**
4. CV curves of **B1-B9**
5. Calculated molecular structures of **B1-B9**
6. HOMO/LUMO energy diagrams of **B1-B9**
7. Calculated biradical character of **B1-B9**
8. <sup>1</sup>H NMR and <sup>13</sup>C NMR spectra of **ThBFs** and corresponding intermediates

# 1. TG curves of B1-B9

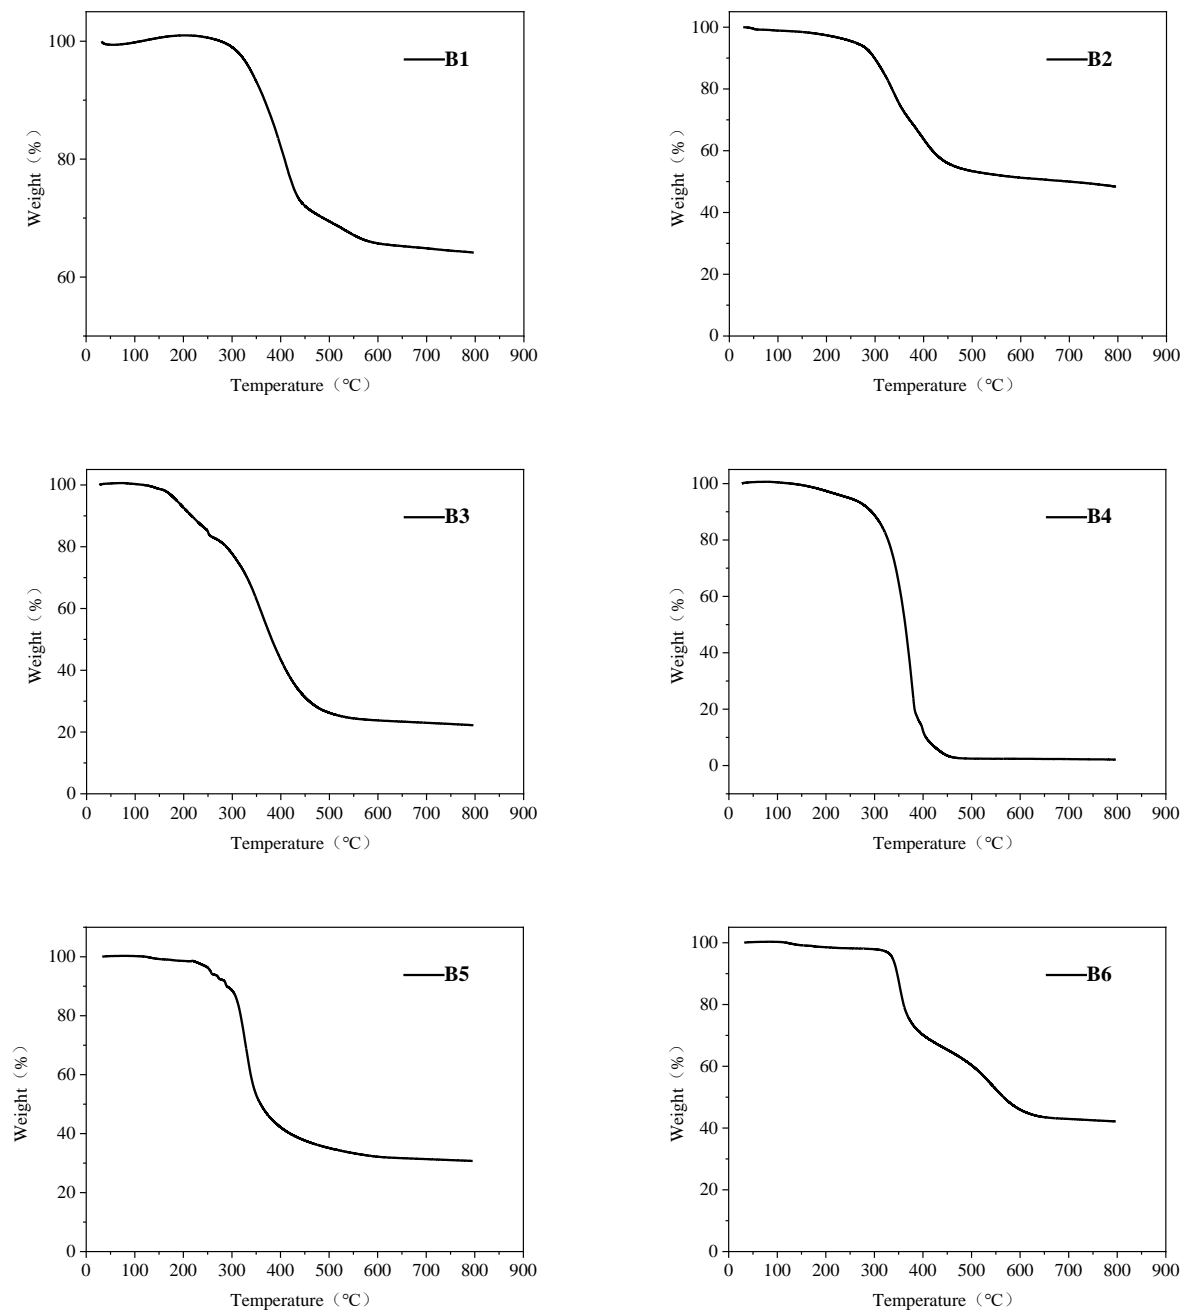

**Fig. S1** TG curves of B1-B9

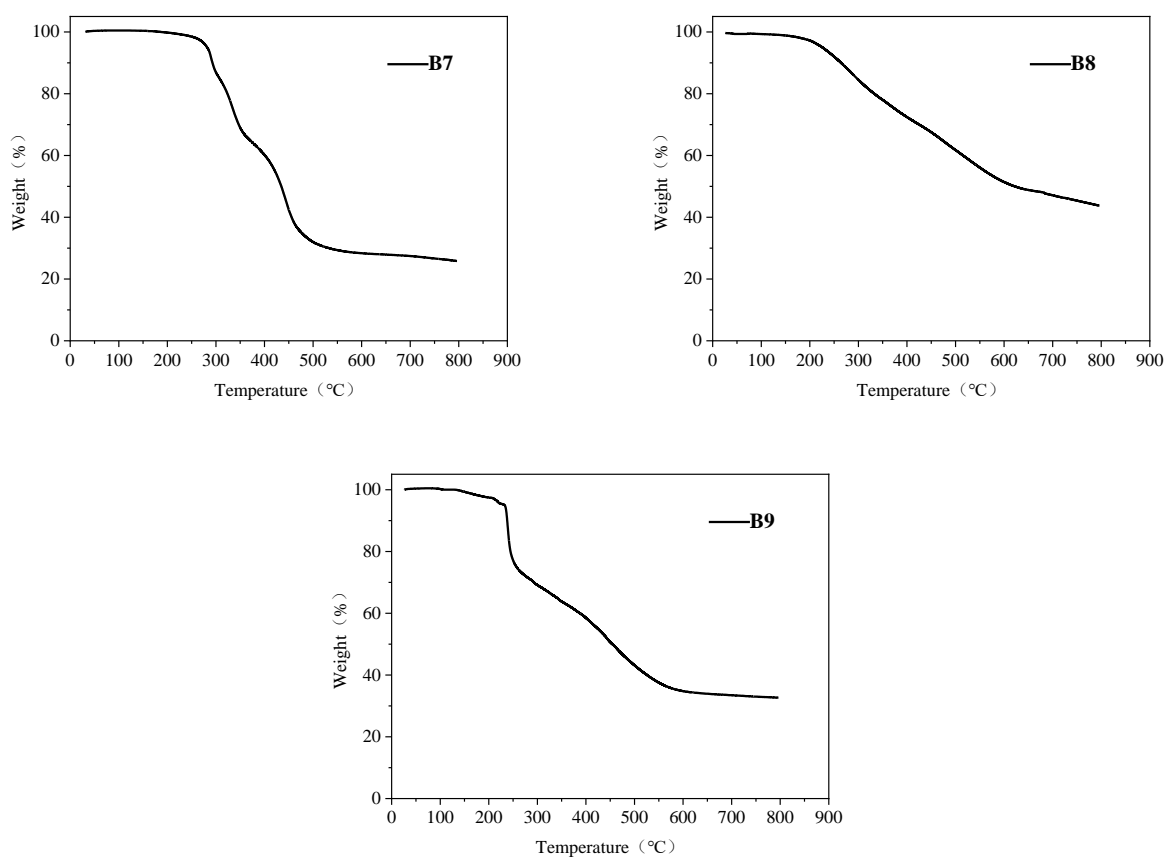

**Fig. S1** TG curves of **B1-B9** (continued)

## 2. Color of **ThBF** derivatives

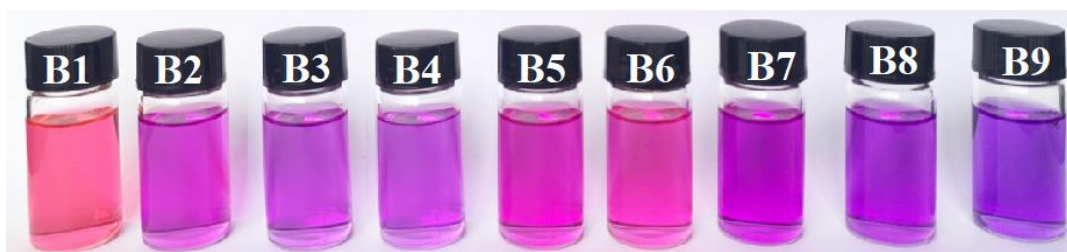

**Fig. S2** Photographs of solution of **ThBFs** in dichloromethane ( $2 \times 10^{-5}$  mol/L)

### 3. Fluorescence spectra of **B1-B9**

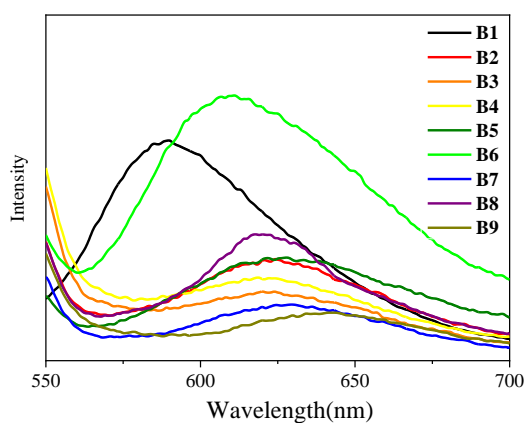

(a) in toluene solution ( $10^{-5}$  mol/L)

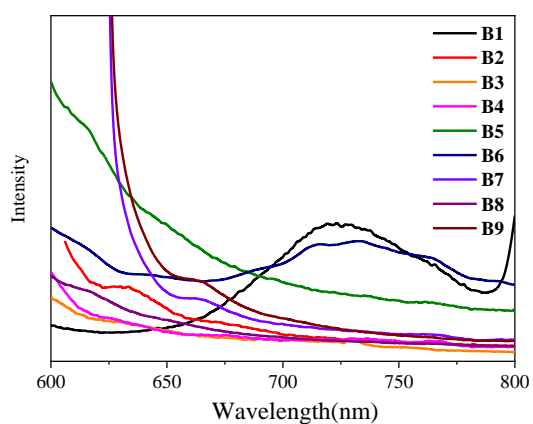

(b) as powder

**Fig. S3** Fluorescence spectra of **B1-B9**

The intensities were tested at the excitation wavelength of 470 nm. The maximum emission wavelengths ( $\lambda_{\max}/\text{nm}$ ) in toluene solution were 590 (**B1**), 624 (**B2**), 620 (**B3**), 622 (**B4**), 628 (**B5**), 611(**B6**), 630 (**B7**), 620 (**B8**), and 643 (**B9**). Only **B1** ( $\lambda_{\max}$ : 725 nm) and **B5** ( $\lambda_{\max}$ : 730 nm) exhibited weak photoluminescence as powder.

#### 4. CV curves of B1-B9

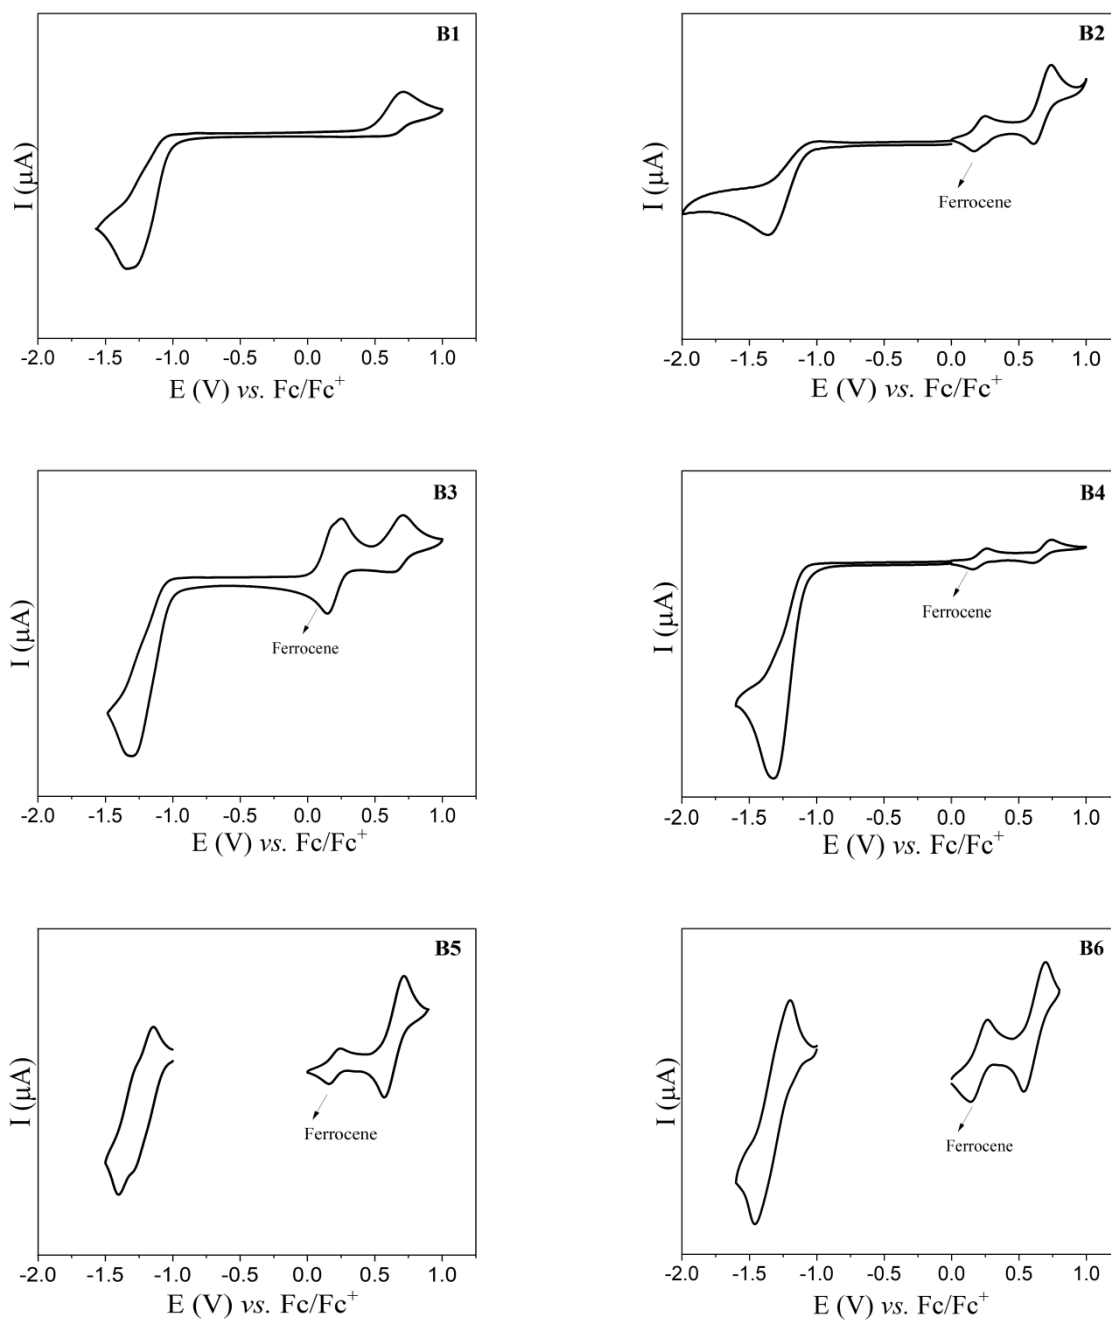

**Fig. S4** CV curves of B1-B9

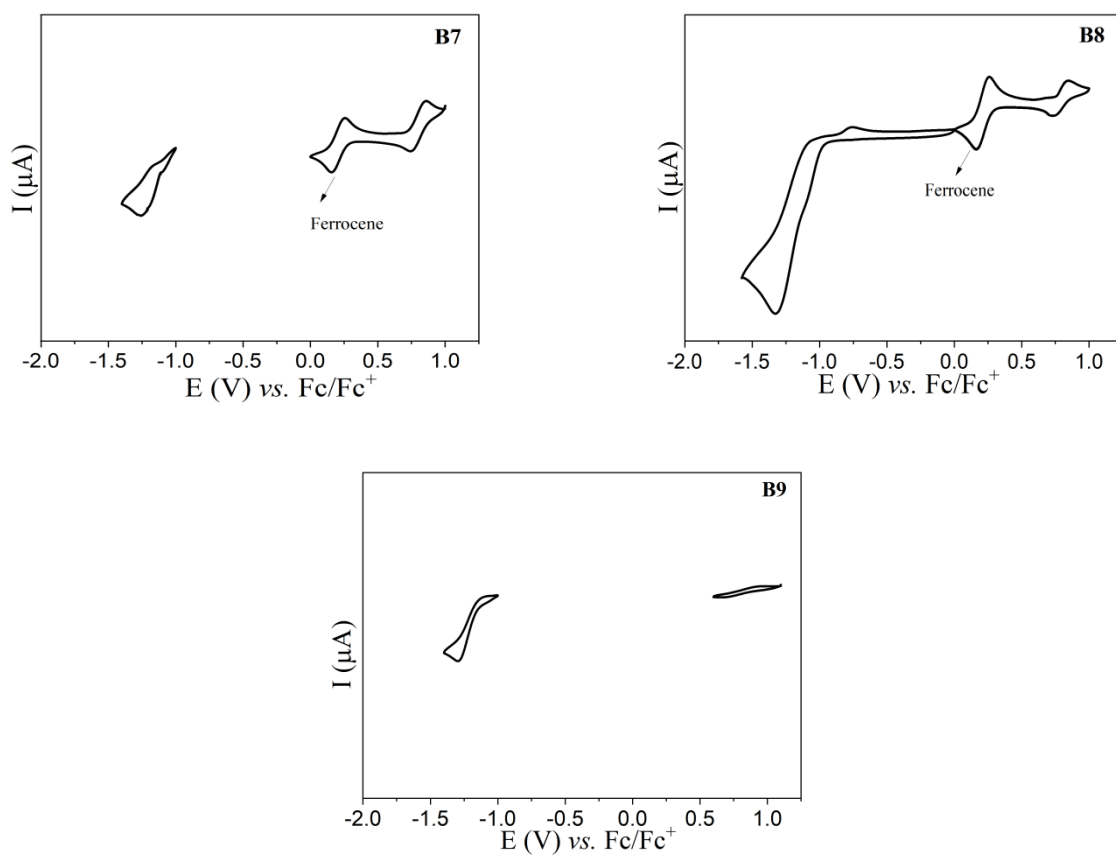

**Fig. S4** CV curves of **B1-B9** (continued)

5. Calculated molecular structures of **B1-B9**

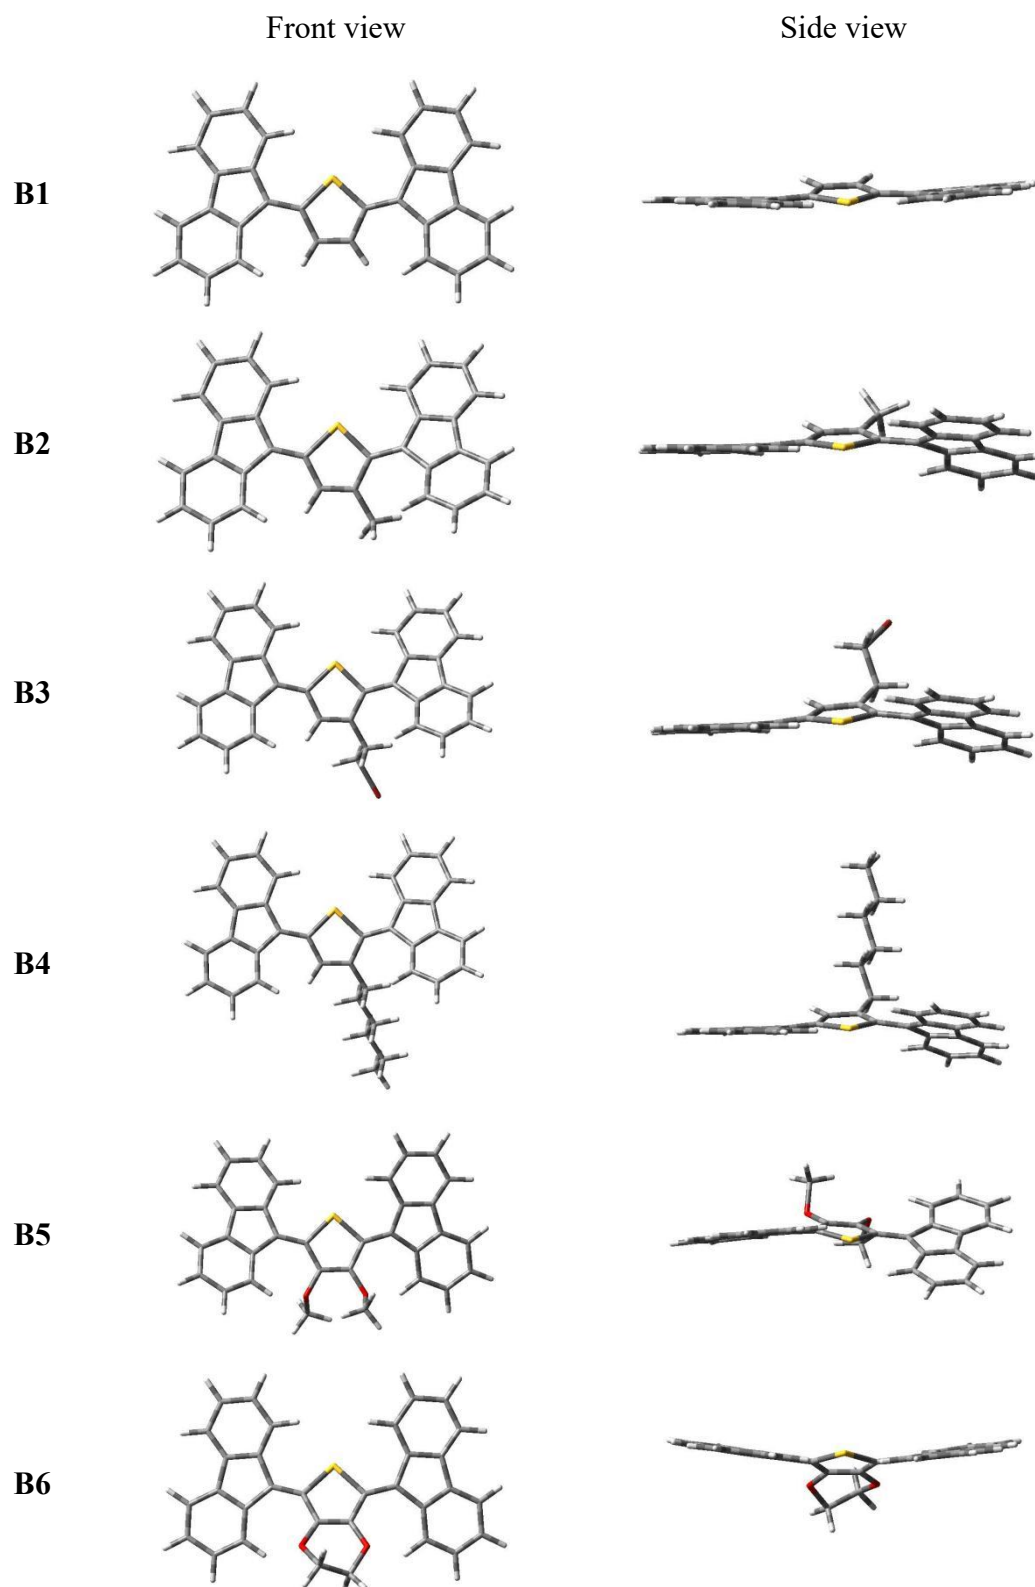

**Fig. S5** Calculated molecular structures of **B1-B9**

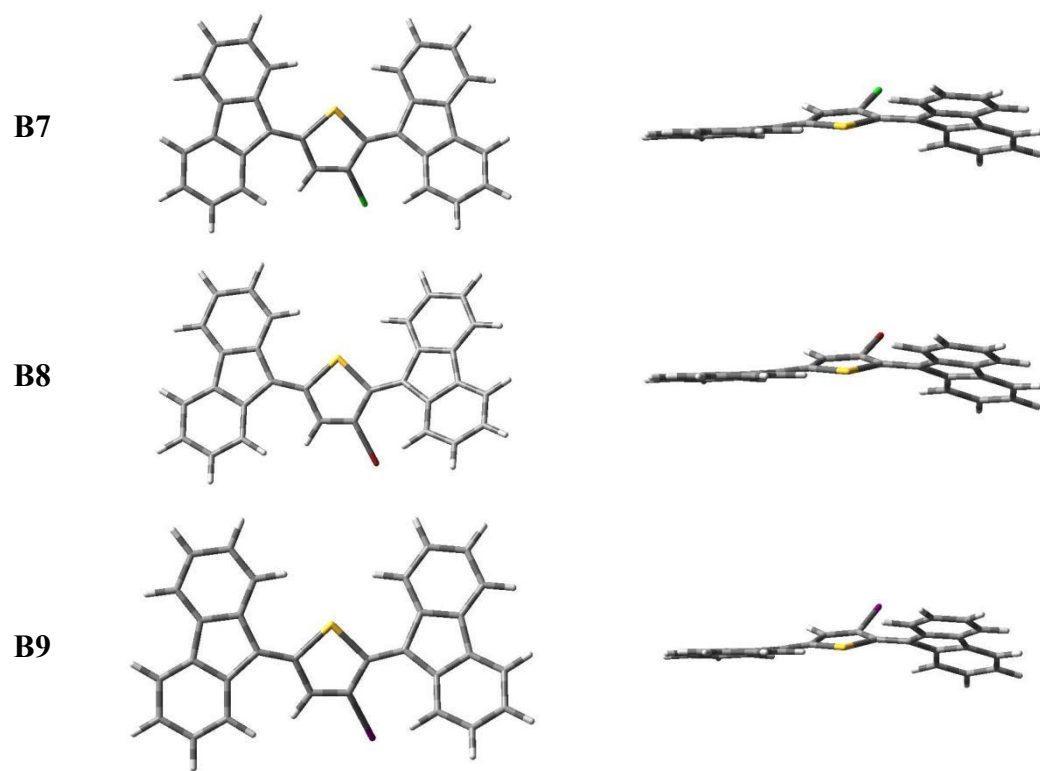

**Fig. S5** Calculated molecular structures of **B1-B9** (continued)



6. HOMO/LUMO energy diagrams of **B1-B9****Tab. S1** HOMO/LUMO energy diagrams of **B1-B9**

|           | HOMO                                                                                              | LUMO                                                                                               | Gap  |
|-----------|---------------------------------------------------------------------------------------------------|----------------------------------------------------------------------------------------------------|------|
| <b>B1</b> | 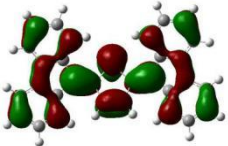<br>-5.3228 eV   | <br>-2.9939 eV   | 2.33 |
| <b>B2</b> | <br>-5.2553 eV   | <br>-3.0385 eV   | 2.22 |
| <b>B3</b> | <br>-5.3879 eV  | <br>-3.1958 eV  | 2.19 |
| <b>B4</b> | <br>-5.2246 eV | <br>-3.0195 eV | 2.21 |
| <b>B5</b> | <br>-5.1522 eV | <br>-2.8592 eV | 2.29 |
| <b>B6</b> | <br>-5.199 eV  | <br>-2.985 eV  | 2.21 |
| <b>B7</b> | <br>-5.440 eV  | <br>-3.244 eV  | 2.20 |

**Tab. S1** HOMO/LUMO energy diagrams of **B1-B9** (continued)

|           | HOMO                                                                                           | LUMO                                                                                            | Gap  |
|-----------|------------------------------------------------------------------------------------------------|-------------------------------------------------------------------------------------------------|------|
| <b>B8</b> | 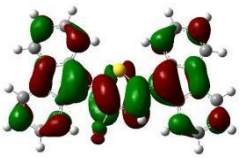<br>-5.420 eV | <br>-3.226 eV | 2.19 |
| <b>B9</b> | <br>-5.398 eV | <br>-3.005 eV | 2.27 |

The above optimized structure and the HOMO/LUMO energy diagrams were calculated by Gaussian 09.<sup>a</sup> And The biradical characters and the energies of the singlet  $E(S_1)$  and triplet  $E(T_1)$  excited states were calculated by Gaussian 16.<sup>b</sup>

<sup>a</sup>Gaussian 09, Revision D.01, M. J. Frisch, G. W. Trucks, H. B. Schlegel, G. E. Scuseria, M. A. Robb, J. R. Cheeseman, G. Scalmani, V. Barone, B. Mennucci, G. A. Petersson, H. Nakatsuji, M. Caricato, X. Li, H. P. Hratchian, A. F. Izmaylov, J. Bloino, G. Zheng, J. L. Sonnenberg, M. Hada, M. Ehara, K. Toyota, R. Fukuda, J. Hasegawa, M. Ishida, T. Nakajima, Y. Honda, O. Kitao, H. Nakai, T. Vreven, J. A. Montgomery, Jr., J. E. Peralta, F. Ogliaro, M. Bearpark, J. J. Heyd, E. Brothers, K. N. Kudin, V. N. Staroverov, R. Kobayashi, J. Normand, K. Raghavachari, A. Rendell, J. C. Burant, S. S. Iyengar, J. Tomasi, M. Cossi, N. Rega, J. M. Millam, M. Klene, J. E. Knox, J. B. Cross, V. Bakken, C. Adamo, J. Jaramillo, R. Gomperts, R. E. Stratmann, O. Yazyev, A. J. Austin, R. Cammi, C. Pomelli, J. W. Ochterski, R. L. Martin, K. Morokuma, V. G. Zakrzewski, G. A. Voth, P. Salvador, J. J. Dannenberg, S. Dapprich, A. D. Daniels, Ö. Farkas, J. B. Foresman, J. V. Ortiz, J. Cioslowski, and D. J. Fox, Gaussian, Inc., Wallingford CT, 2009.

<sup>b</sup>Gaussian 16, Revision C.01, M. J. Frisch, G. W. Trucks, H. B. Schlegel, G. E. Scuseria, M. A. Robb, J. R. Cheeseman, G. Scalmani, V. Barone, G. A. Petersson, H. Nakatsuji, X. Li, M. Caricato, A. V. Marenich, J. Bloino, B. G. Janesko, R. Gomperts, B. Mennucci, H. P. Hratchian, J. V. Ortiz, A. F. Izmaylov, J. L. Sonnenberg, D. Williams-Young, F. Ding, F. Lipparini, F. Egidi, J. Goings, B. Peng, A. Petrone, T. Henderson, D. Ranasinghe, V. G. Zakrzewski, J. Gao, N. Rega, G. Zheng, W. Liang, M. Hada, M. Ehara, K. Toyota, R. Fukuda, J. Hasegawa, M. Ishida, T. Nakajima, Y. Honda, O. Kitao, H. Nakai, T. Vreven, K. Throssell, J. A. Montgomery, Jr., J. E. Peralta, F. Ogliaro, M. J. Bearpark, J. J. Heyd, E. N. Brothers, K. N. Kudin, V. N. Staroverov, T. A. Keith, R. Kobayashi, J. Normand, K. Raghavachari, A. P. Rendell, J. C. Burant, S. S. Iyengar, J. Tomasi, M. Cossi, J. M. Millam, M. Klene, C. Adamo, R. Cammi, J. W. Ochterski, R. L. Martin, K. Morokuma, O. Farkas, J. B. Foresman, and D. J. Fox, Gaussian, Inc., Wallingford CT, 2019.

## 7. Calculated biradical character of **B1-B9**

The biradical character ( $y$ ) was calculated by using the spin-unrestricted Hartree–Fock method at the UHF/6-311G(d) level. The  $y$  value was calculated using the occupation number of the lowest unoccupied natural orbital (LUNO) and the highest unoccupied natural orbital (HONO) of **B1-B9**, which was expressed as:

$$y = 1 - \frac{2T}{1+T^2}$$

where

$$T = \frac{n_{\text{HONO}} - n_{\text{LUNO}}}{2}$$

The detailed  $n_{\text{HONO}}$ ,  $n_{\text{LUNO}}$ ,  $T$  and  $y$  values of **B1-B9** were listed in Tab. S2.

**Tab. S2** The  $n_{\text{HONO}}$ ,  $n_{\text{LUNO}}$ ,  $T$  and  $y$  values of **B1-B9**

|           | $n_{\text{HONO}}$ | $n_{\text{LUNO}}$ | $T$     | $y$                   |
|-----------|-------------------|-------------------|---------|-----------------------|
| <b>B1</b> | 1.43023           | 0.56977           | 0.43023 | 0.27400               |
| <b>B2</b> | 1.38825           | 0.61175           | 0.38825 | 0.325216              |
| <b>B3</b> | 1.39108           | 0.60892           | 0.39108 | 0.321597              |
| <b>B4</b> | 1.38523           | 0.61477           | 0.38523 | 0.329103              |
| <b>B5</b> | 1.99993           | 0.00007           | 0.99993 | $2.45 \times 10^{-9}$ |
| <b>B6</b> | 2                 | 0                 | 1       | 0                     |
| <b>B7</b> | 1.42309           | 0.57691           | 0.42309 | 0.282293              |
| <b>B8</b> | 1.42173           | 0.57827           | 0.42173 | 0.283902              |
| <b>B9</b> | 1.37644           | 0.62356           | 0.37644 | 0.34060               |

*Reference:* S. Intorp, M. Hodecker, M. Müller, O. Tverskoy, M. Rosenkranz, E. Dmitrieva, A. Popov, F. Rominger, J.

Freudenberg, A. Dreuw and U. Bunz, *Angew. Chem. Int. Ed.*, 2020, **59**, 12396-12401.

8.  $^1\text{H}$  NMR and  $^{13}\text{C}$  NMR spectra of **ThBFs** and corresponding intermediates

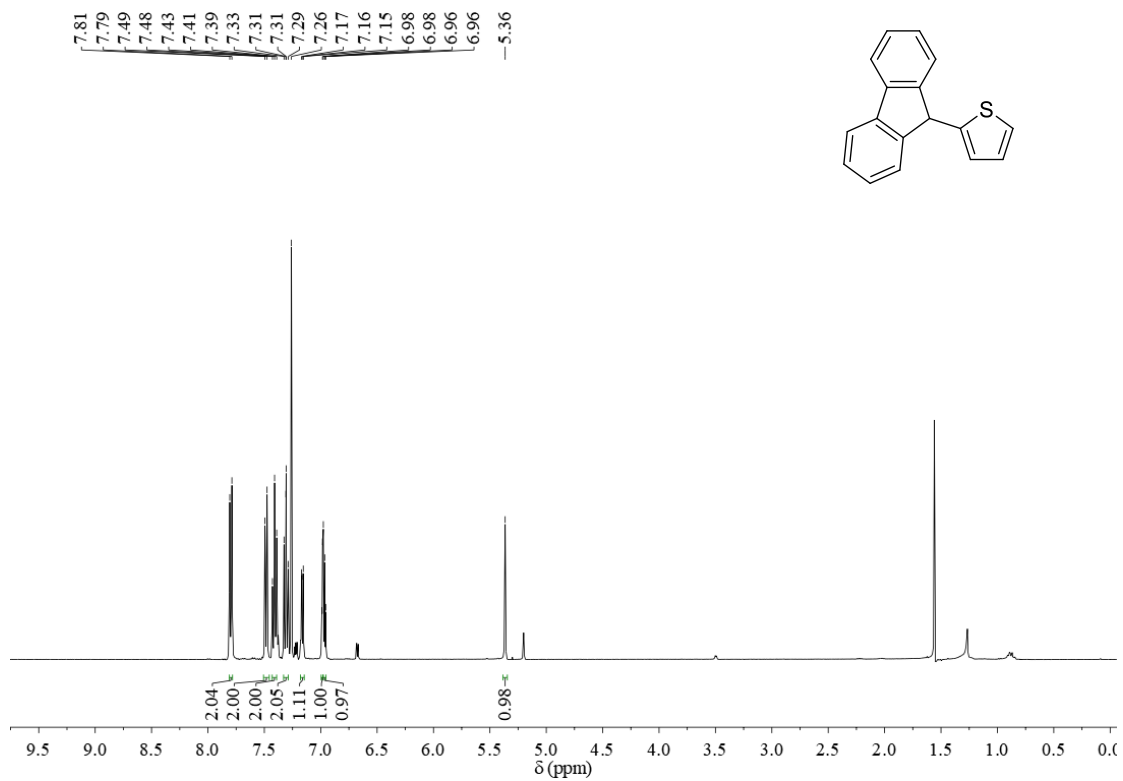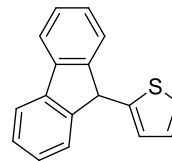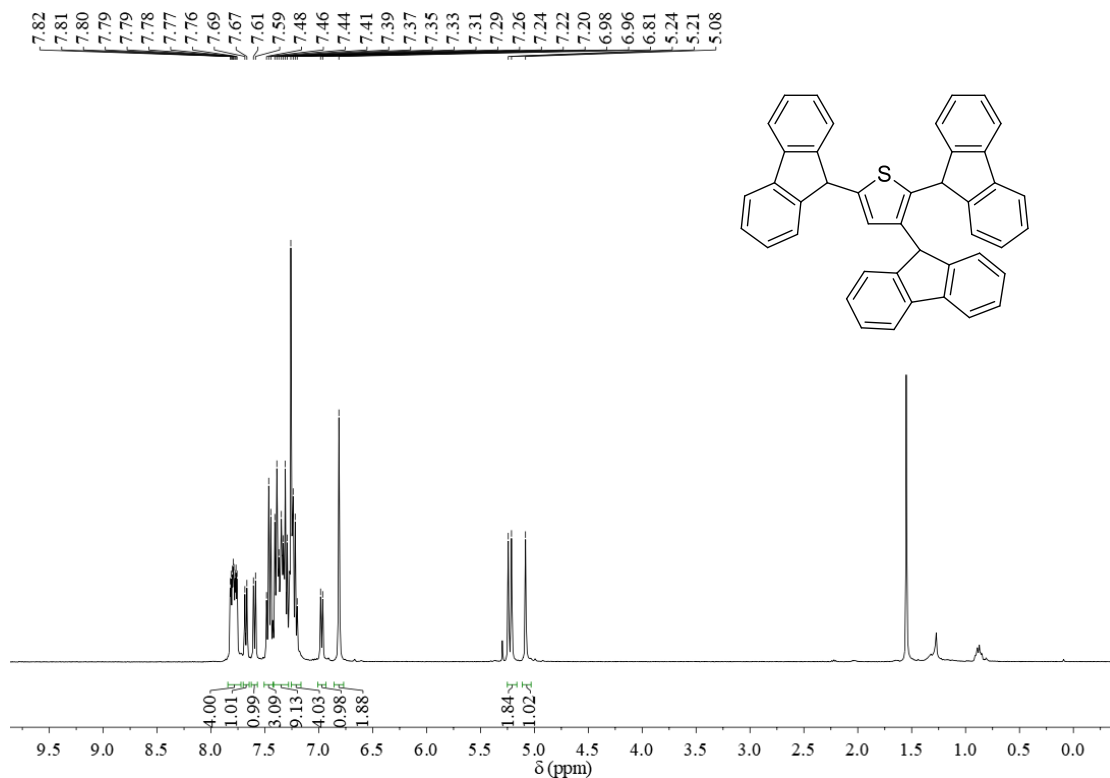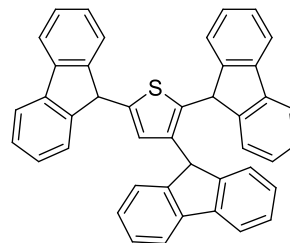

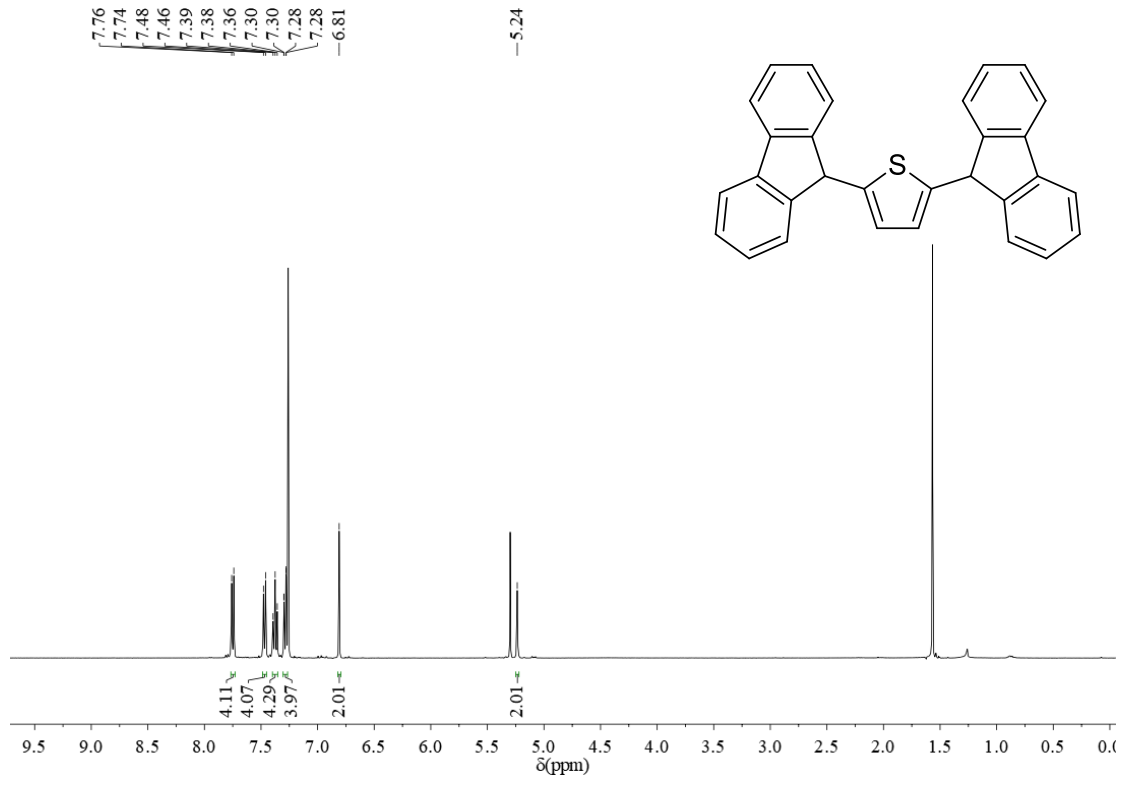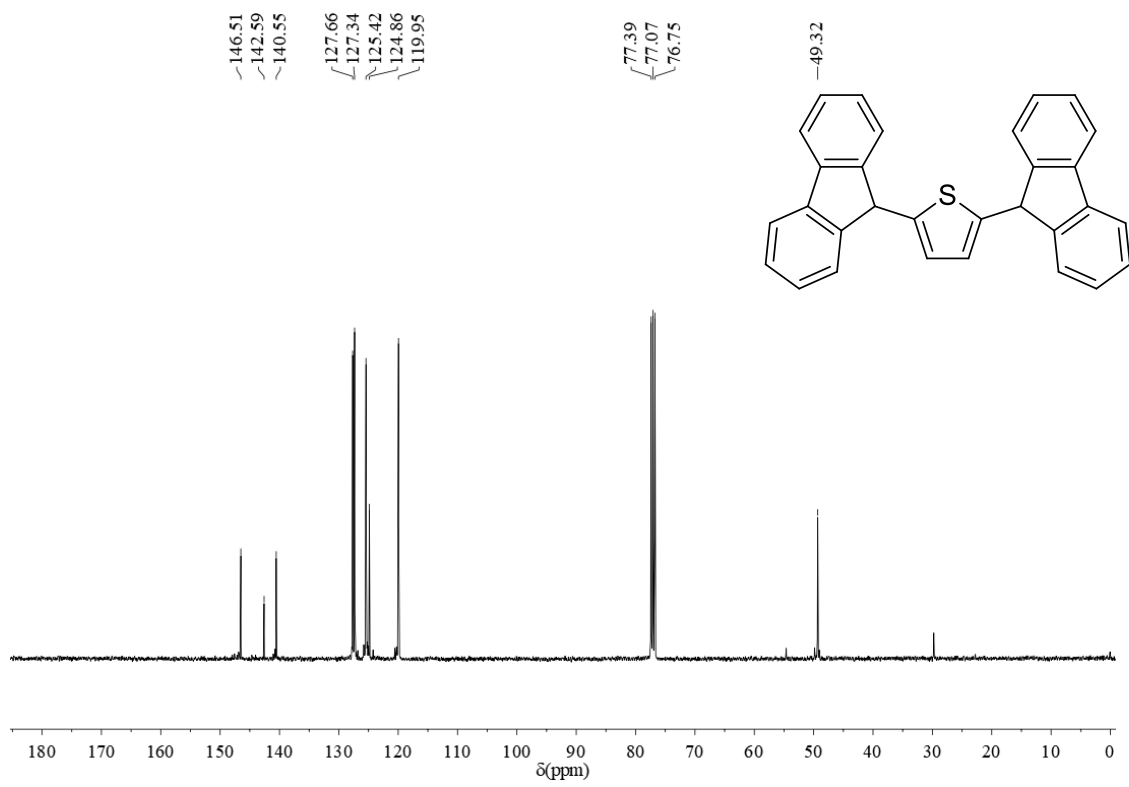

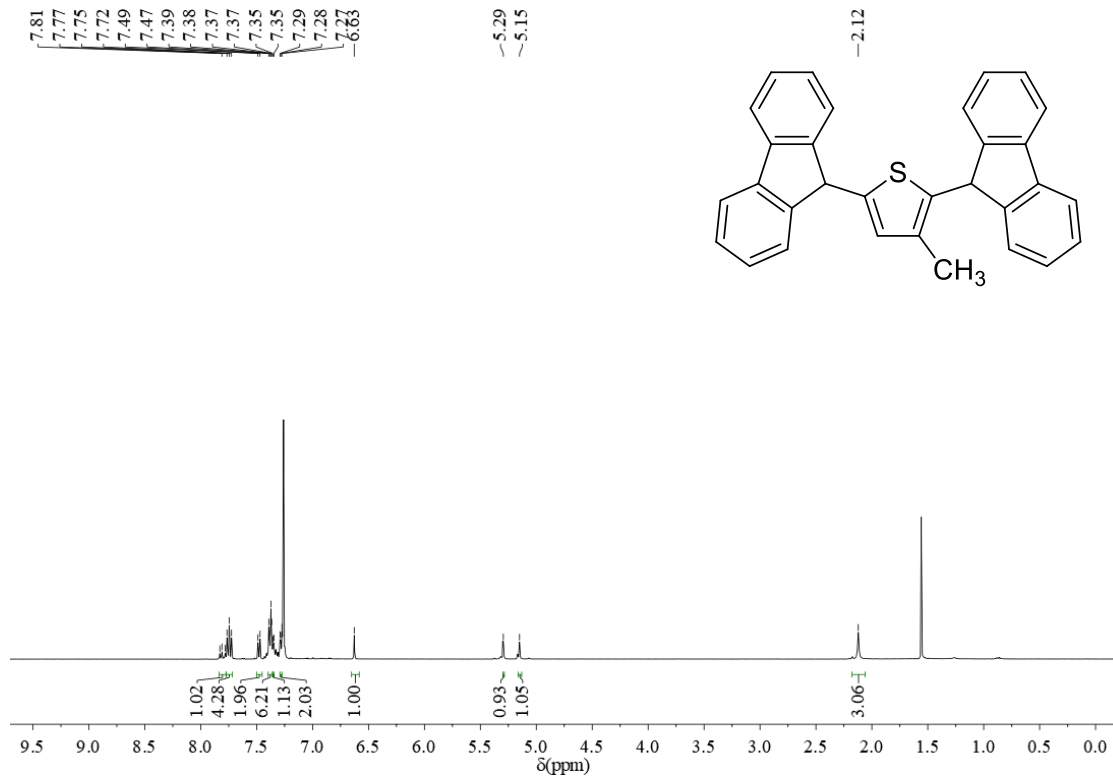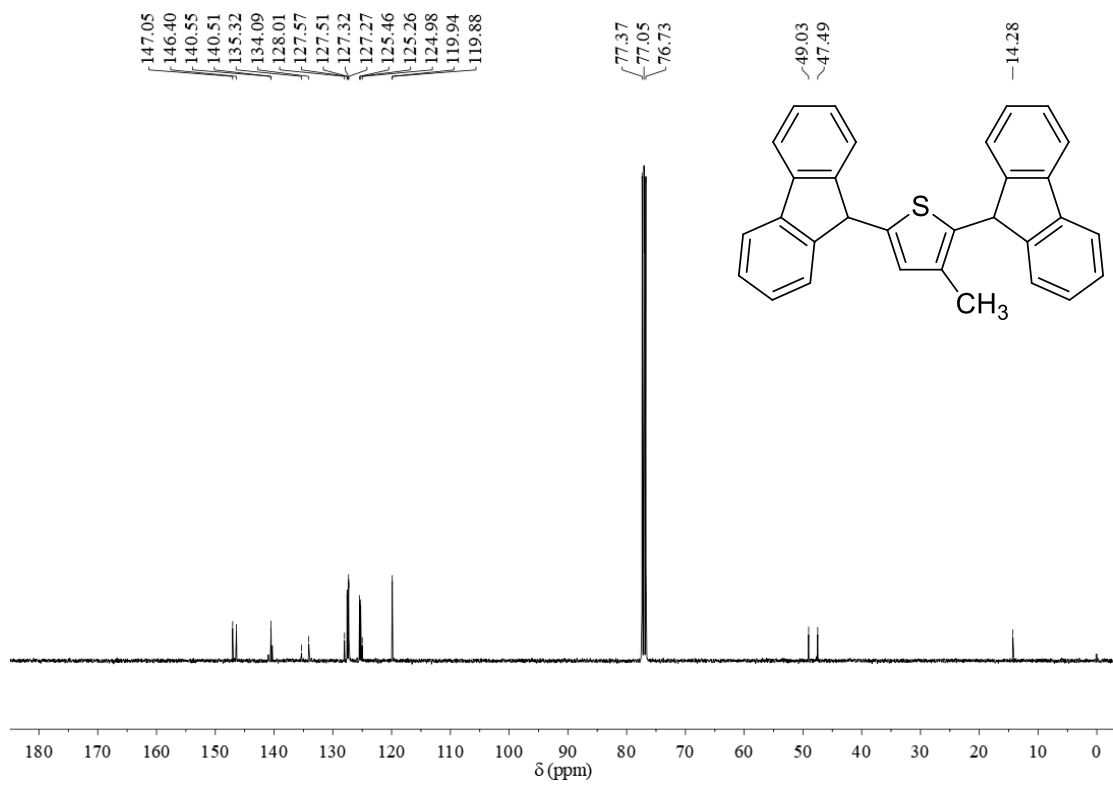

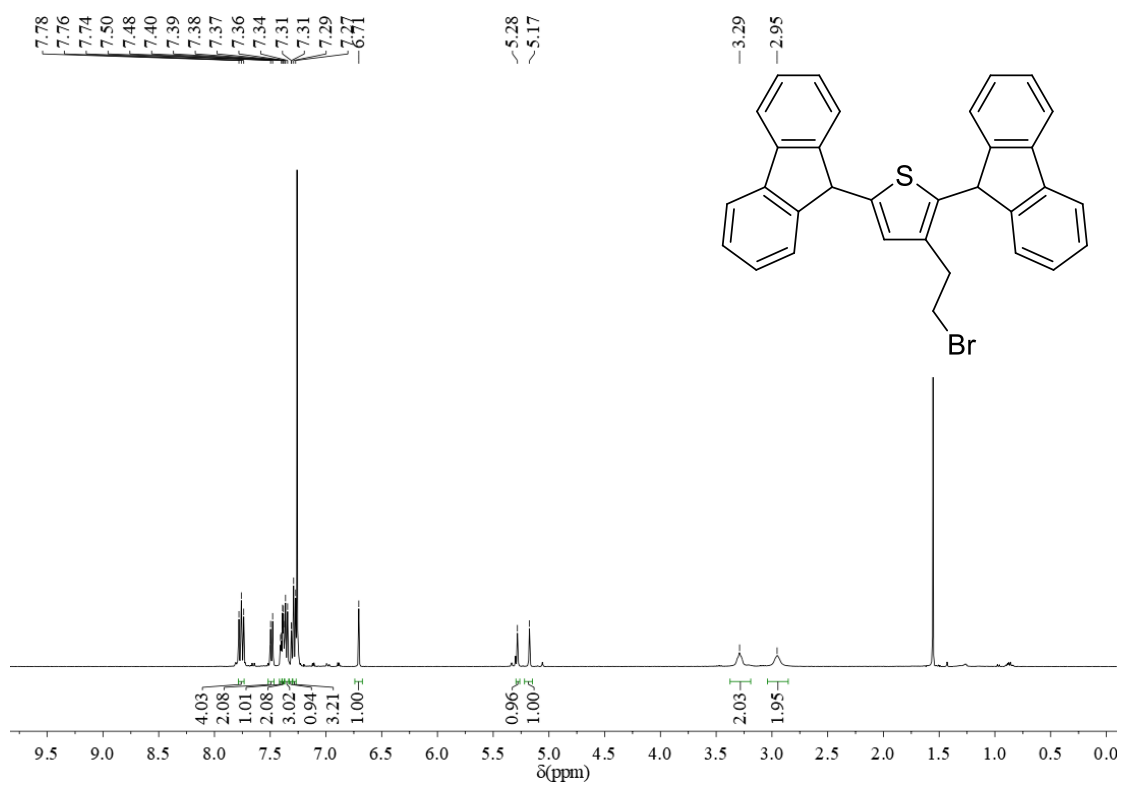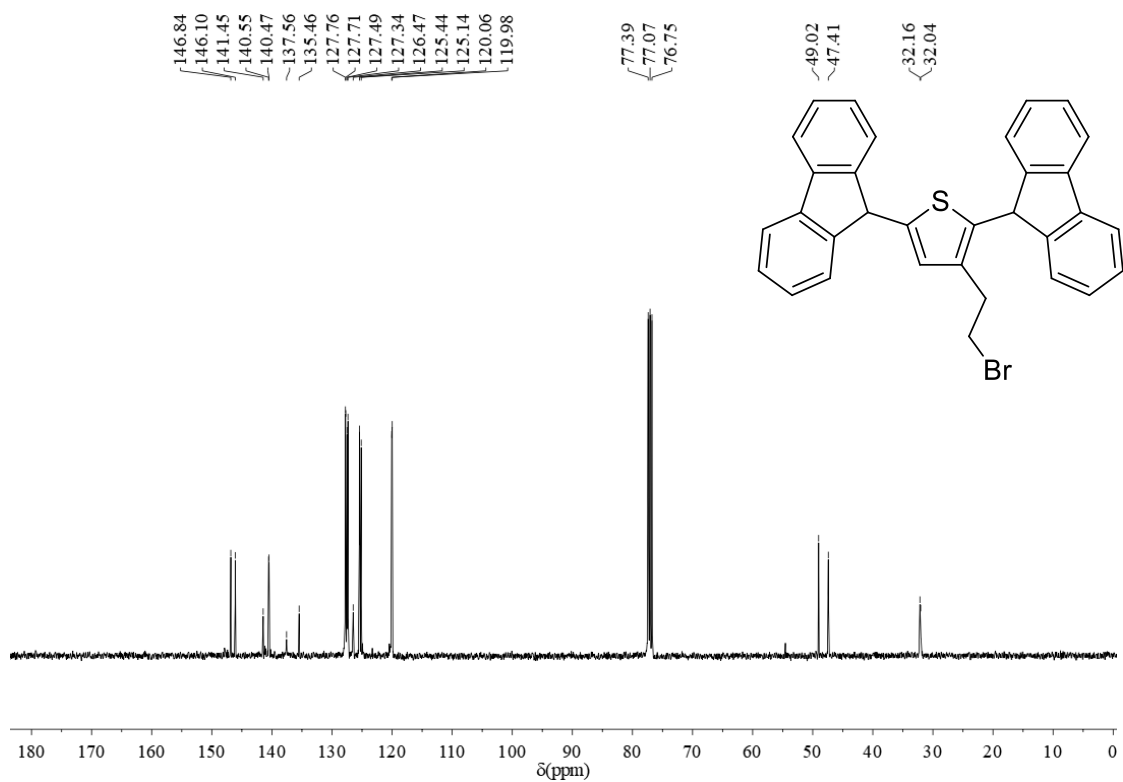

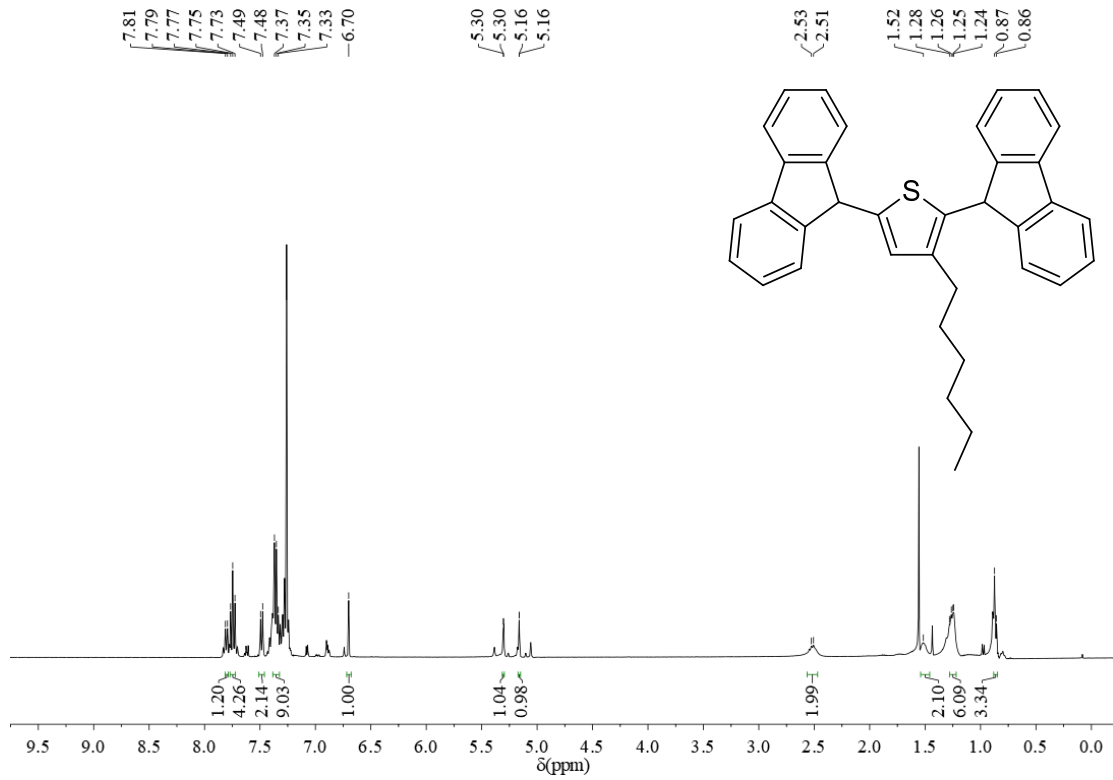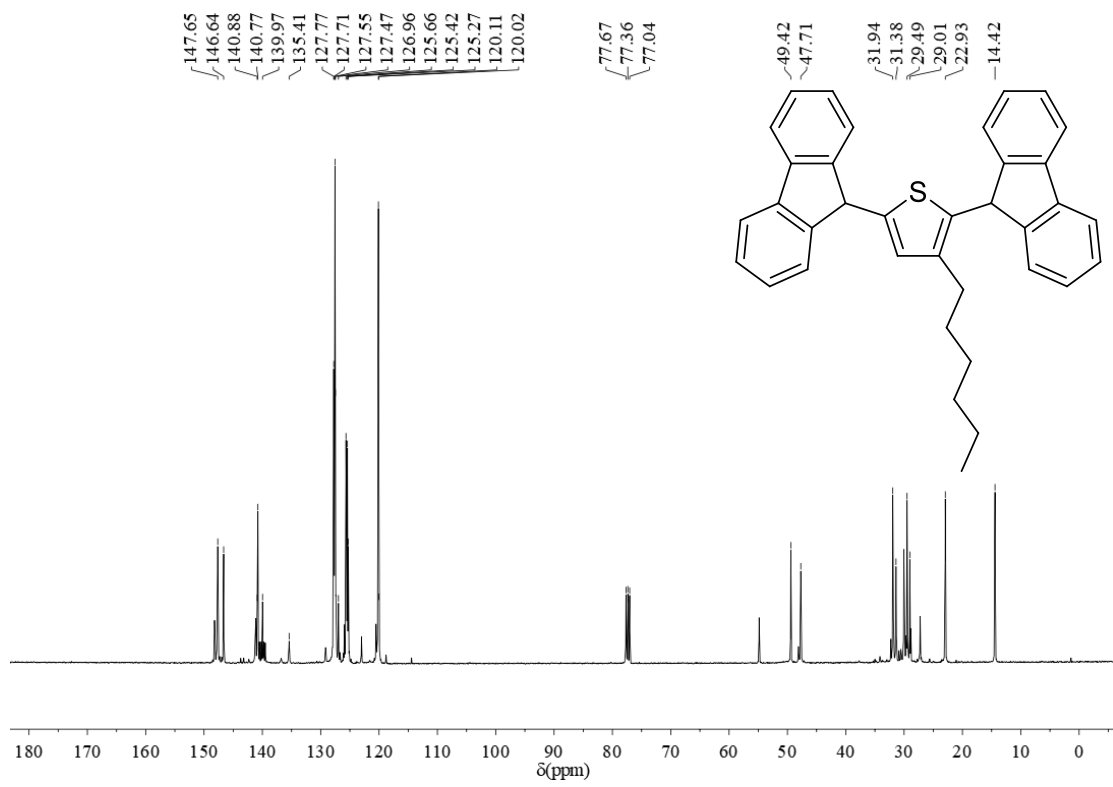



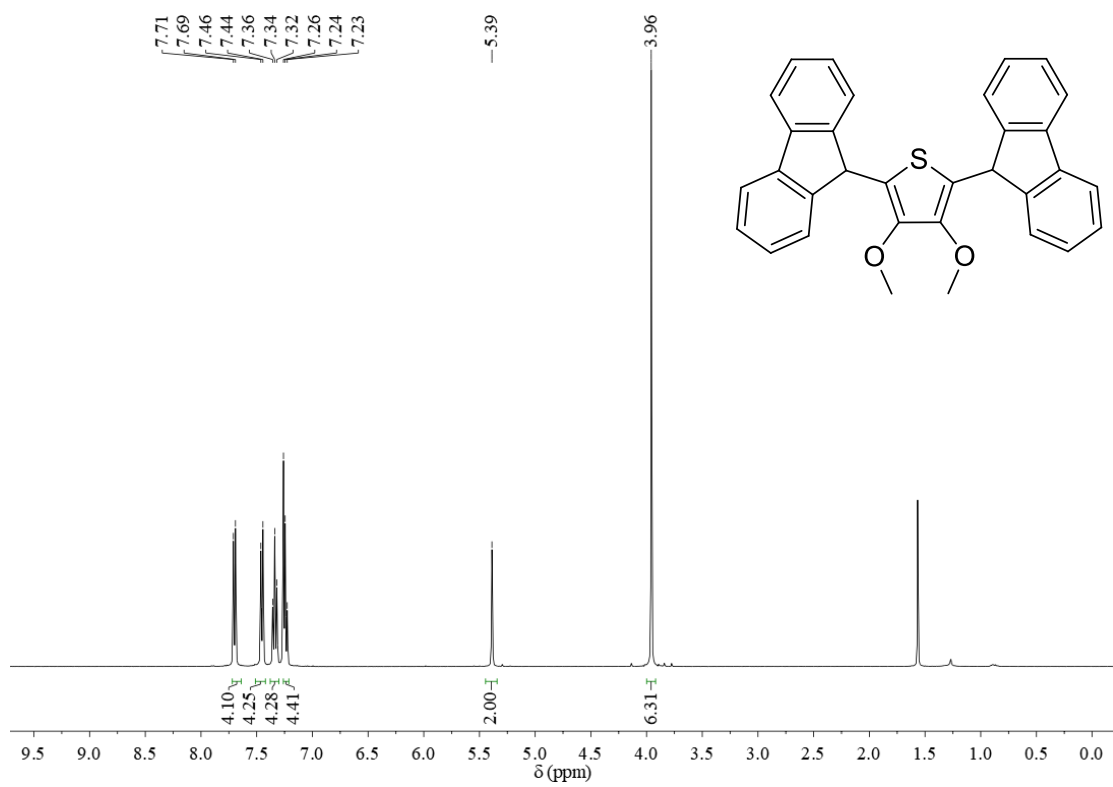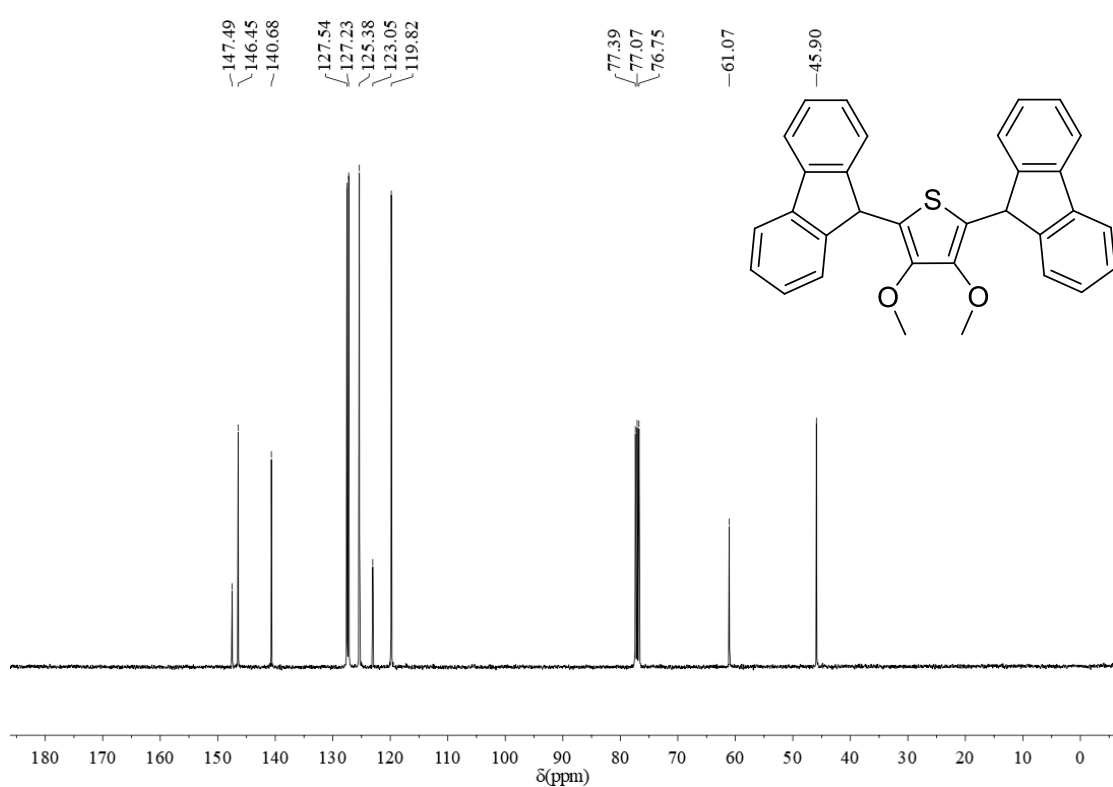

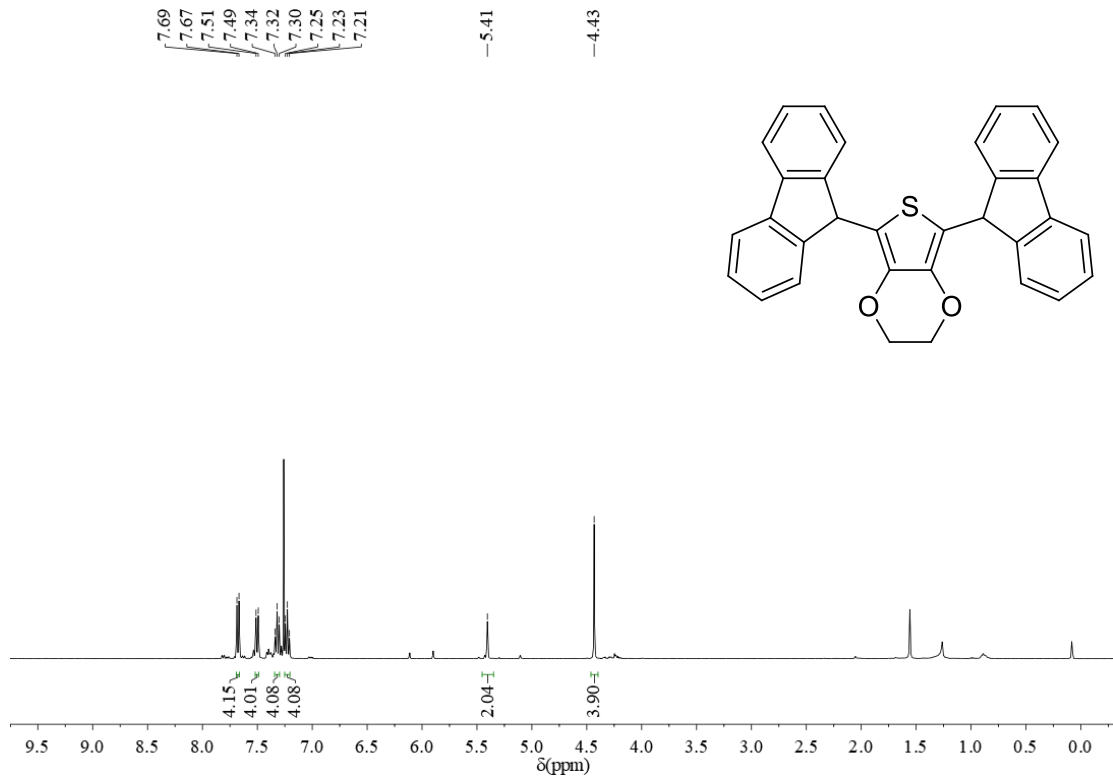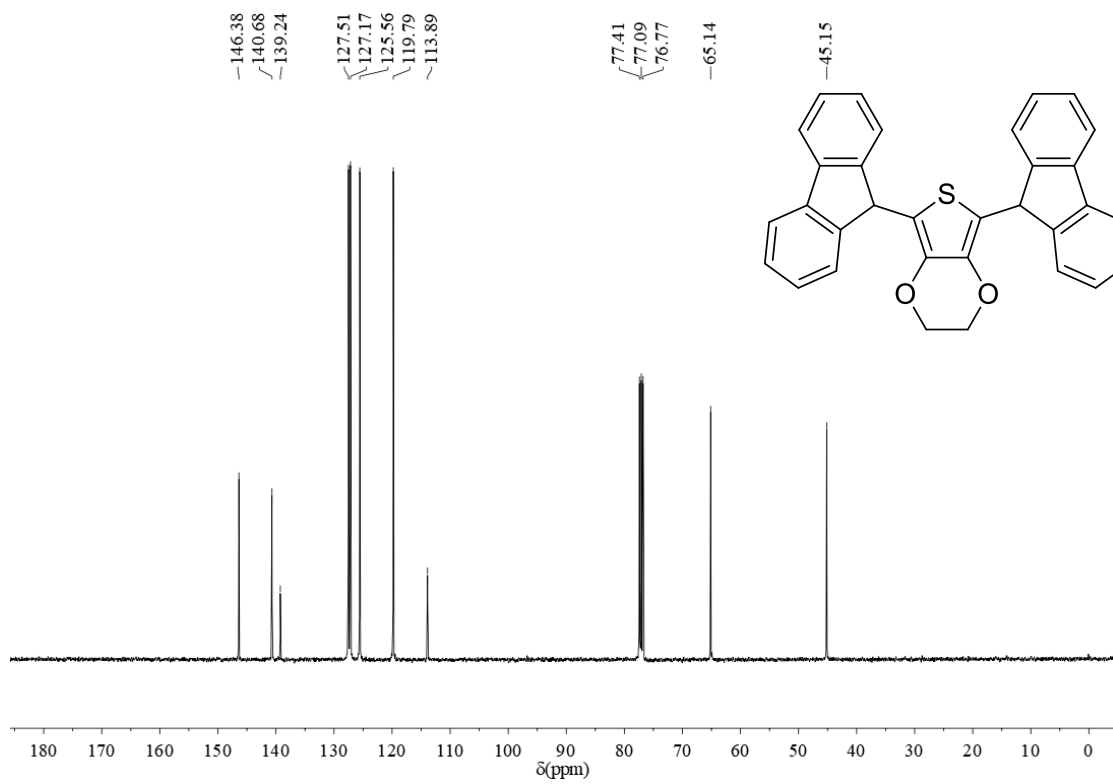

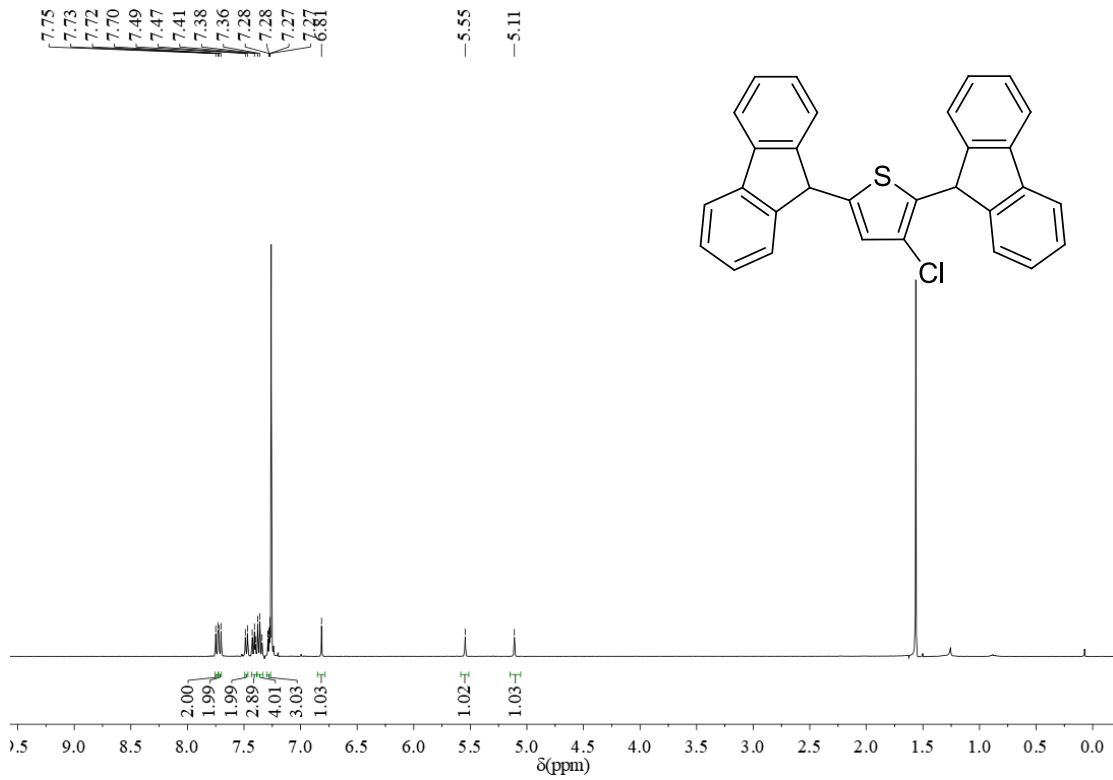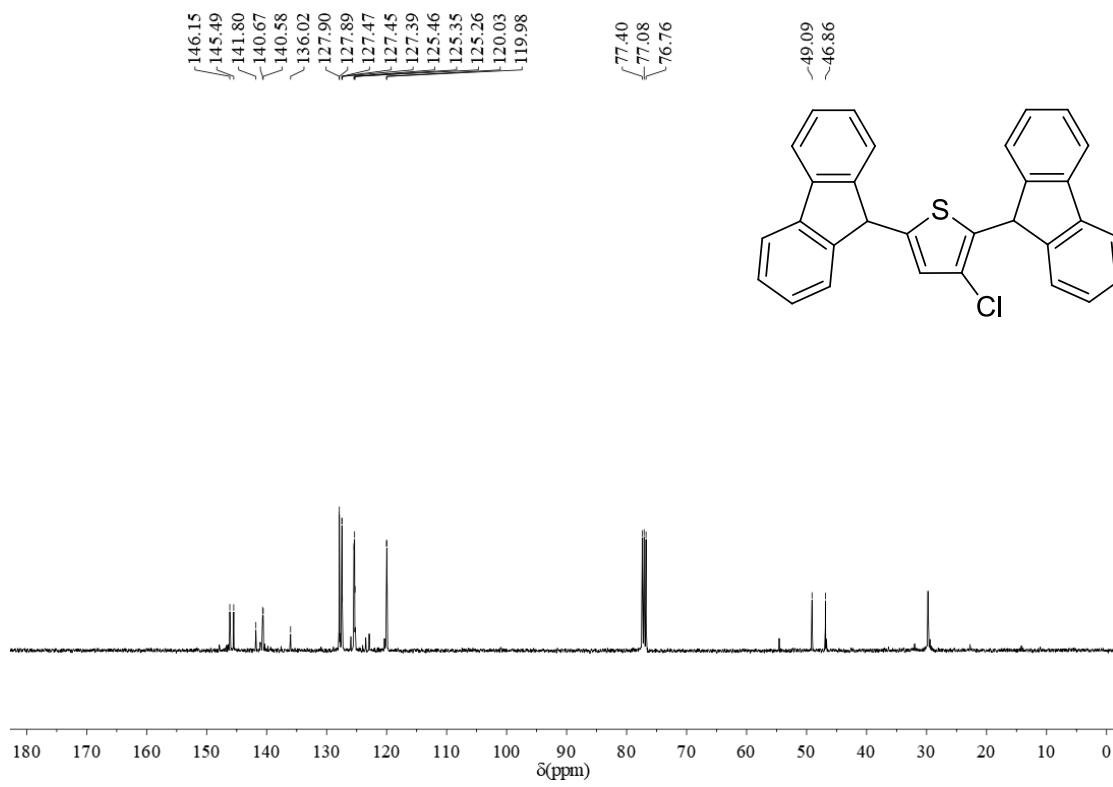

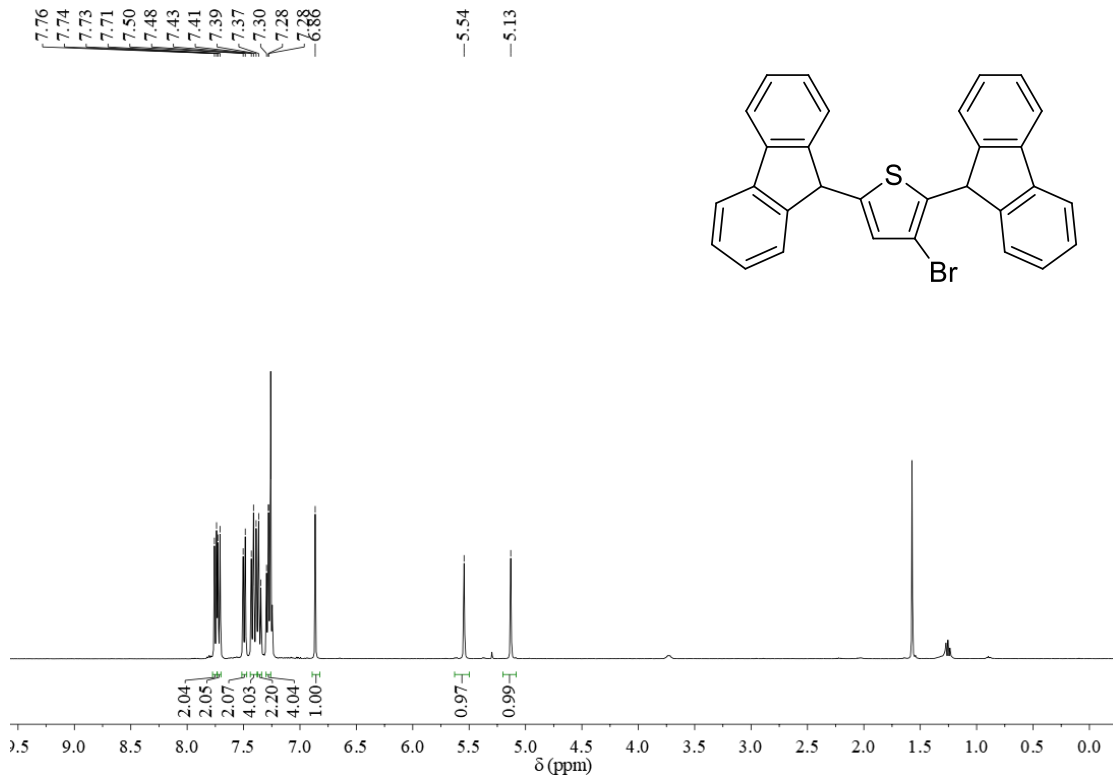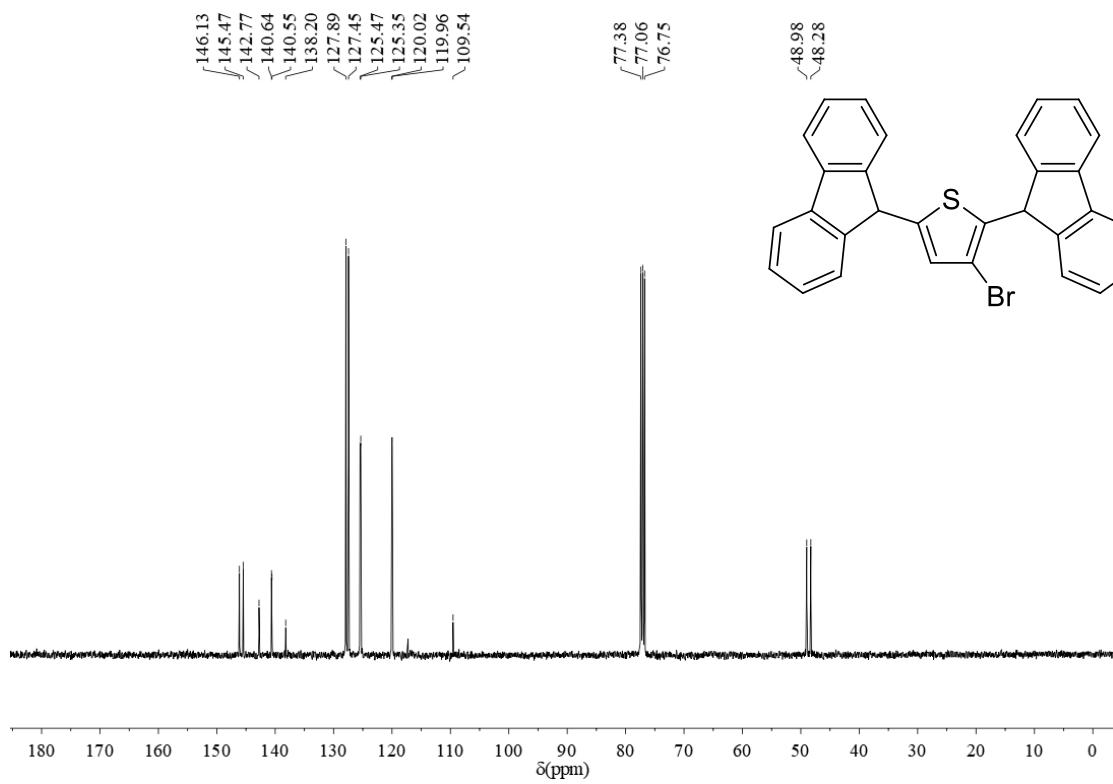

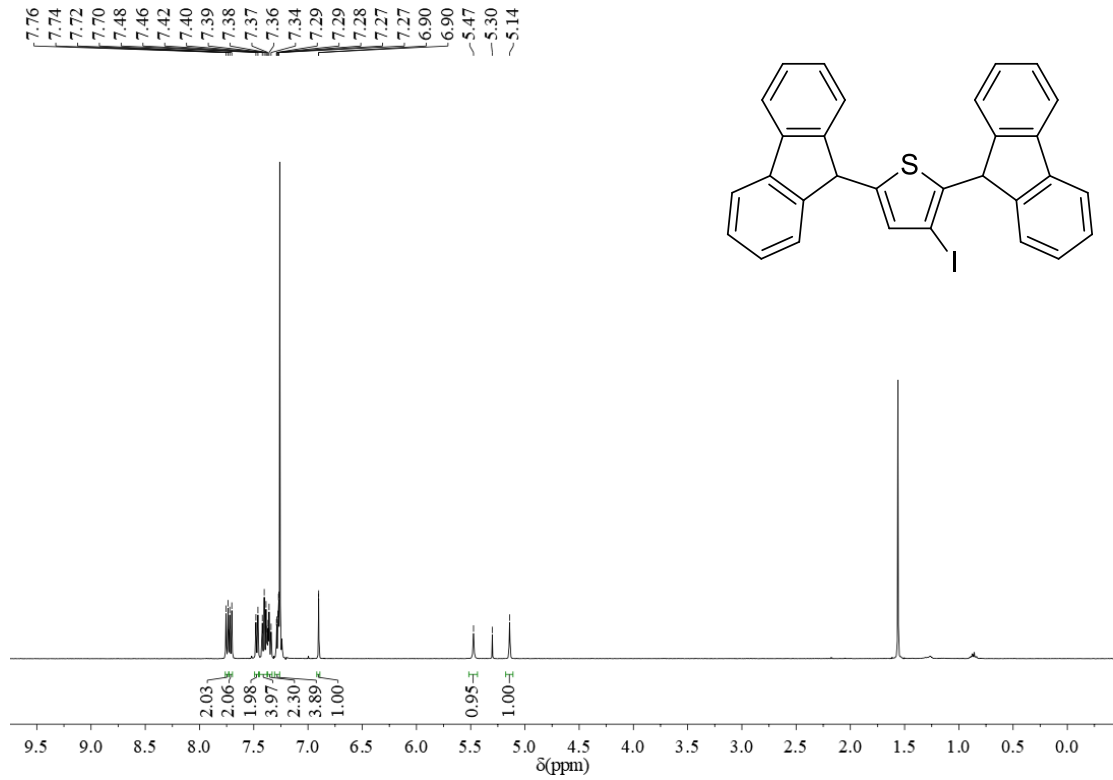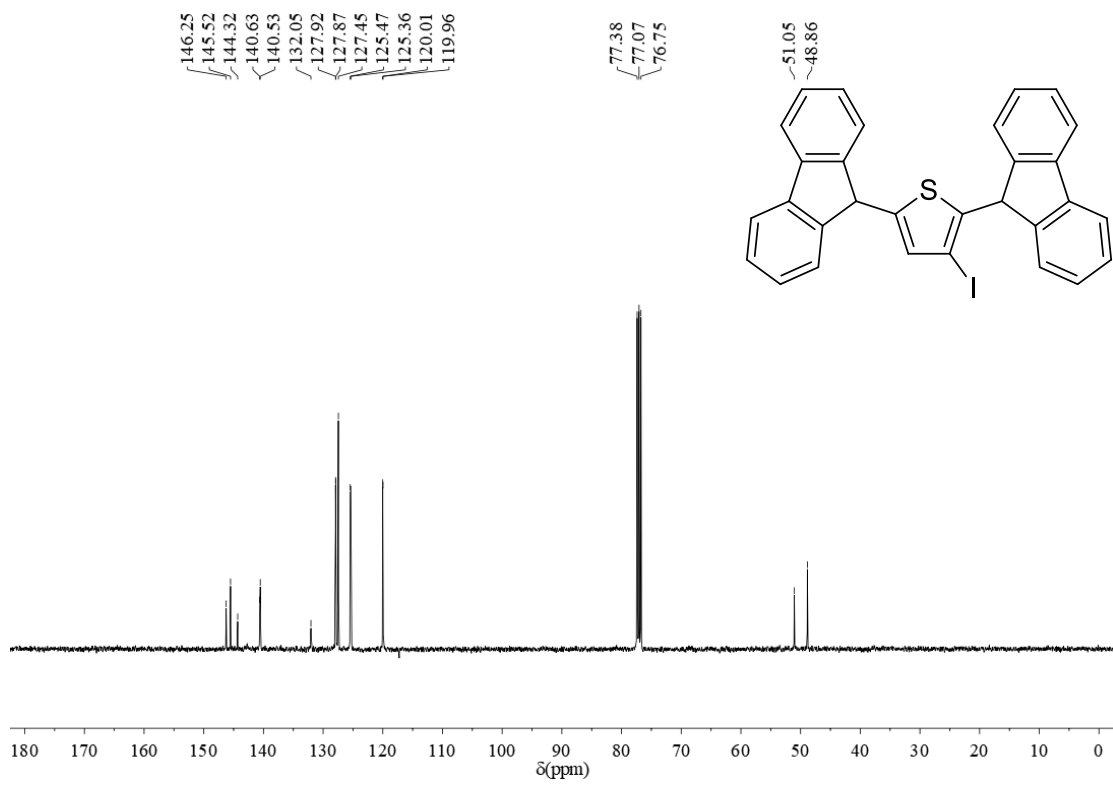

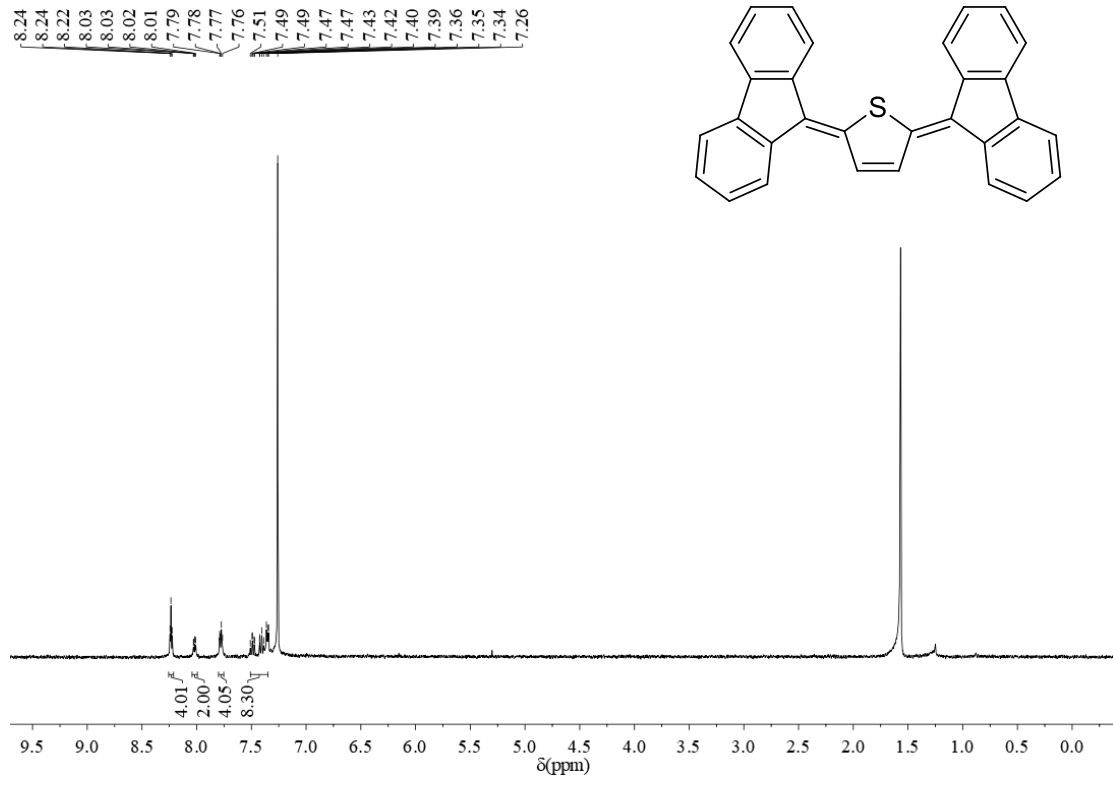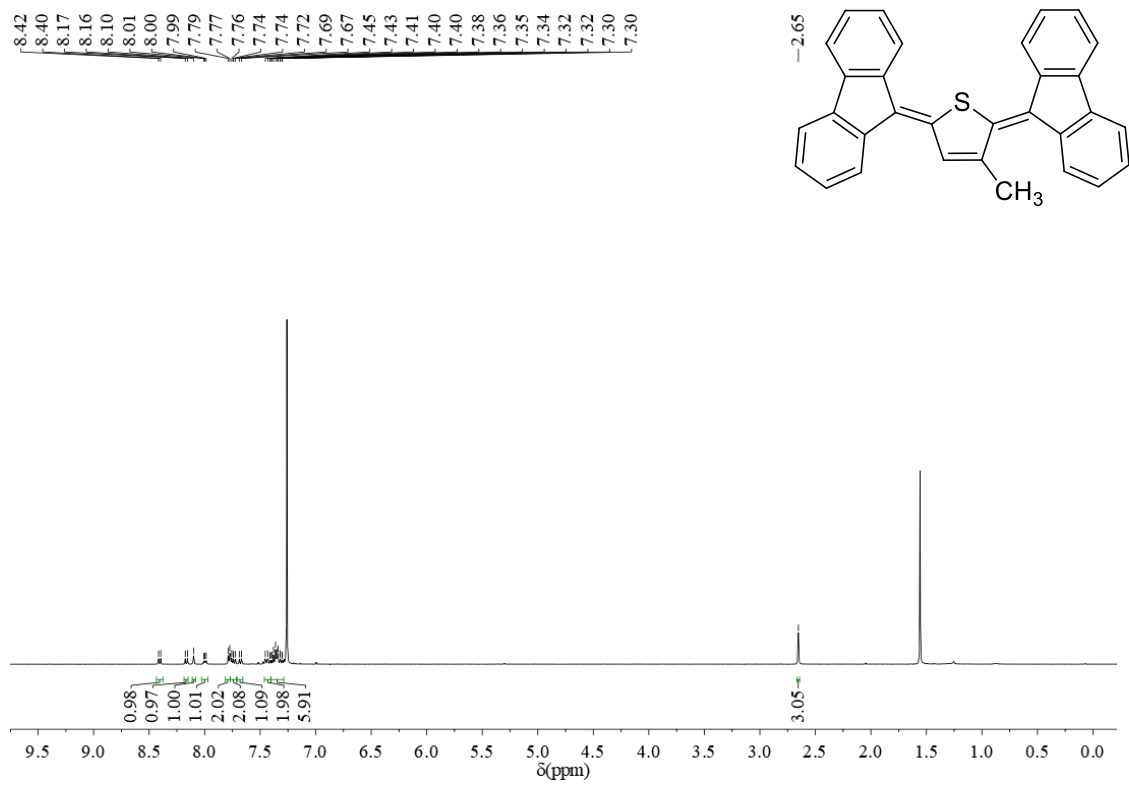

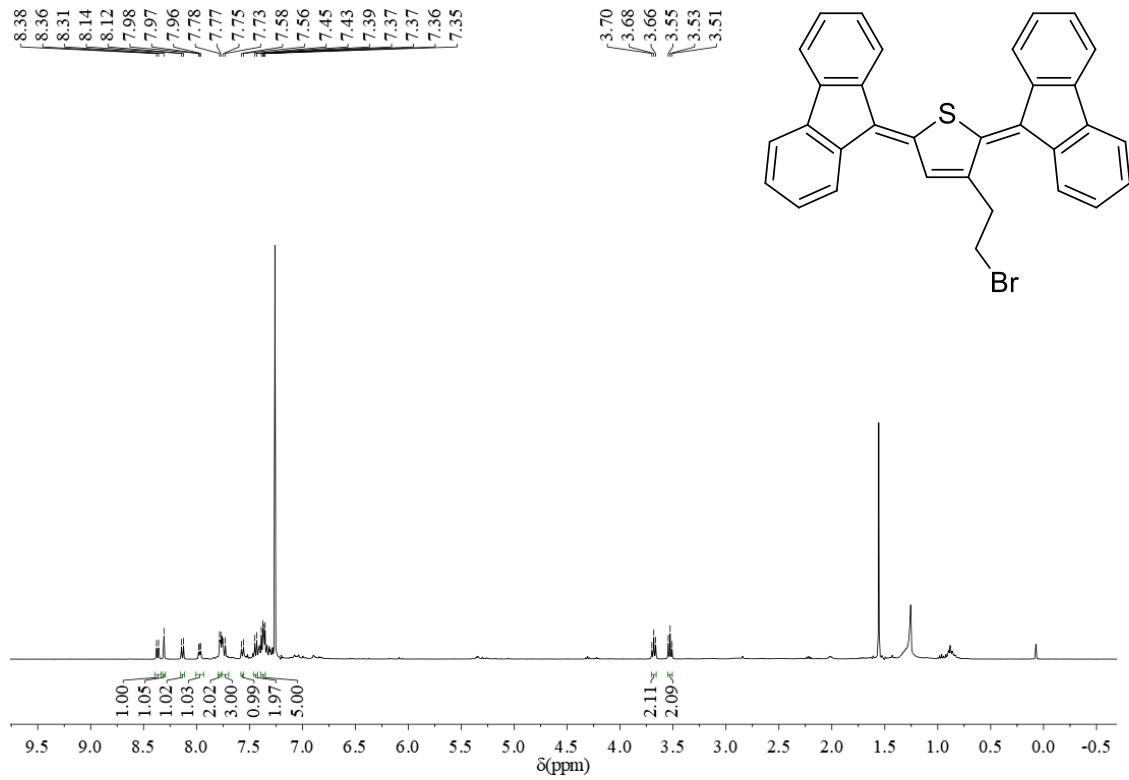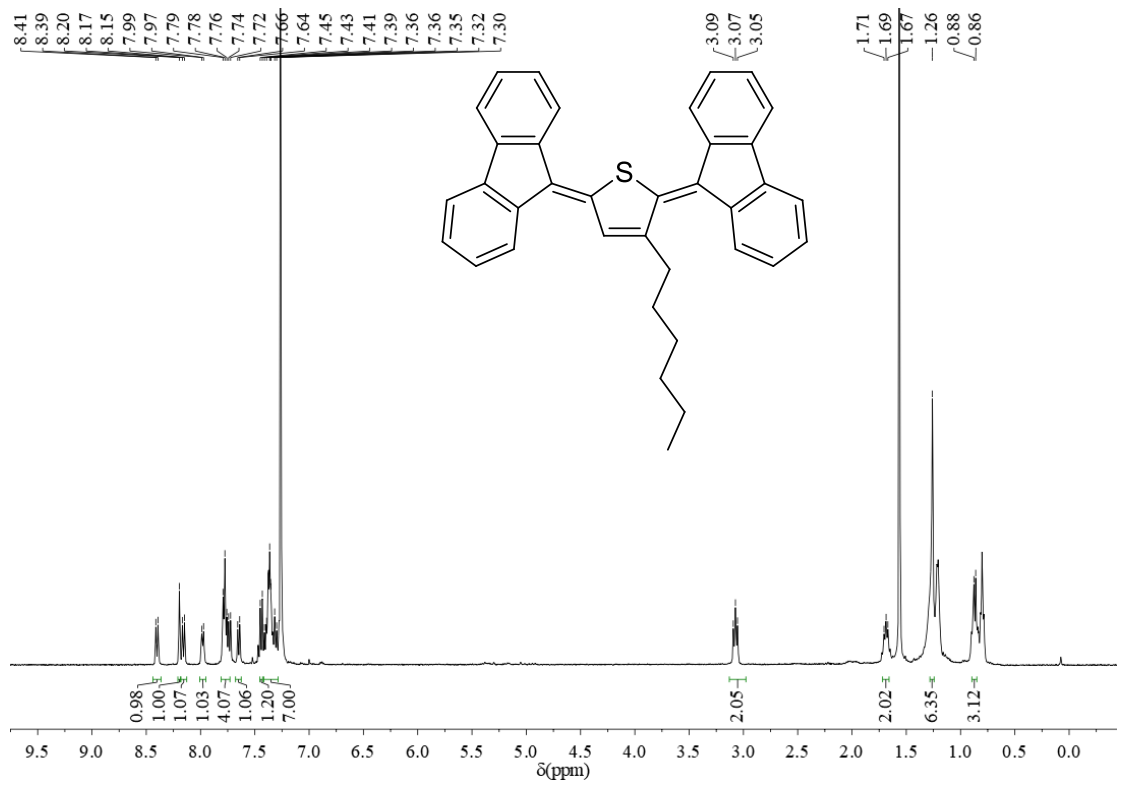

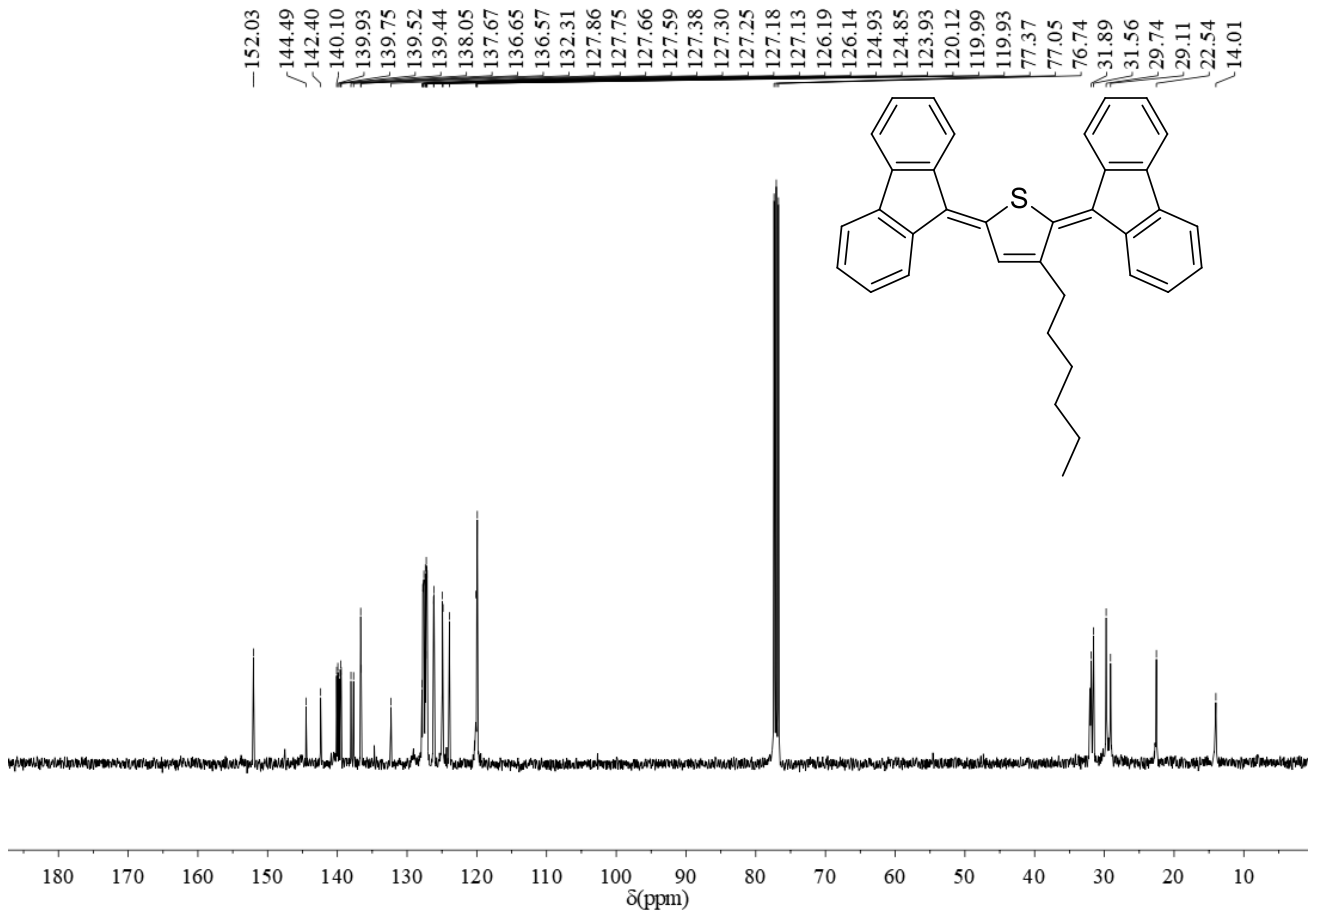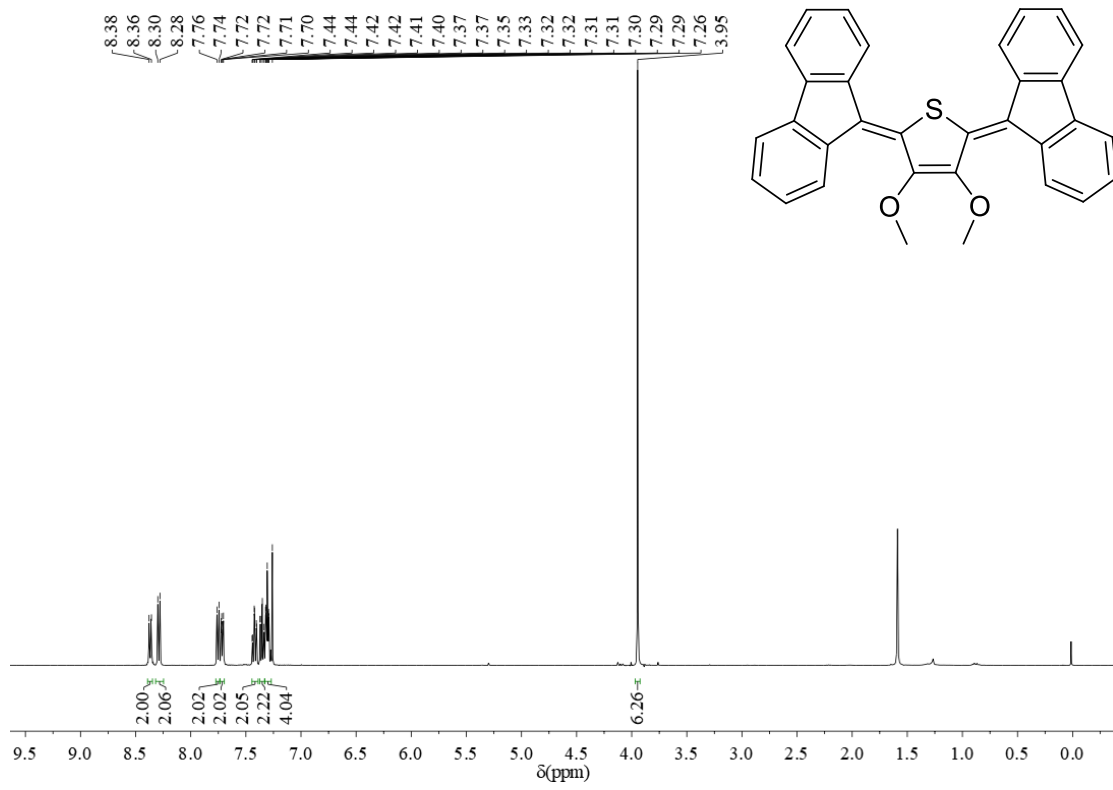



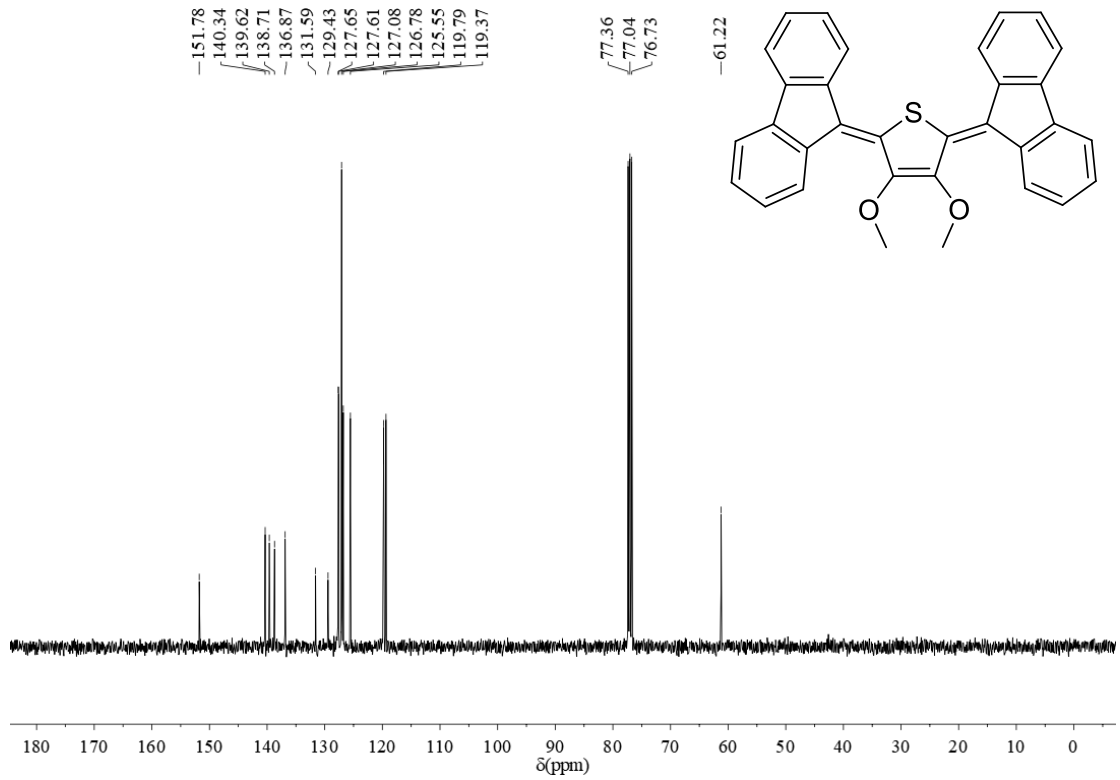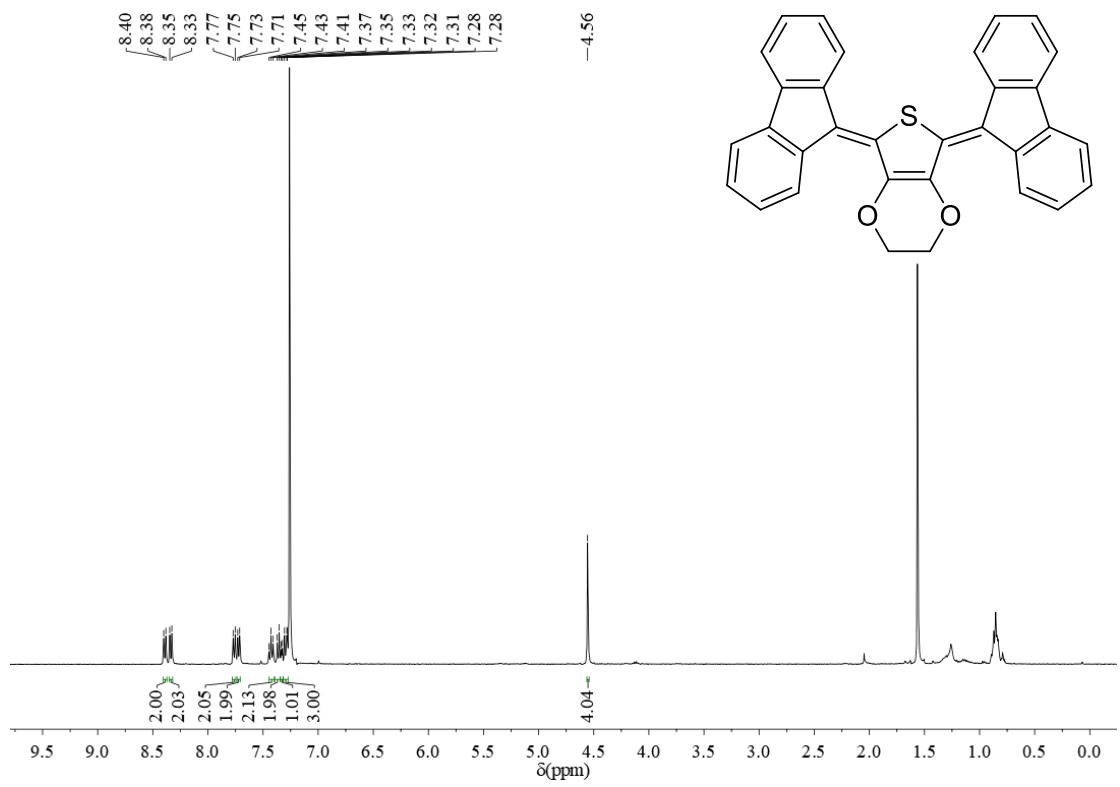

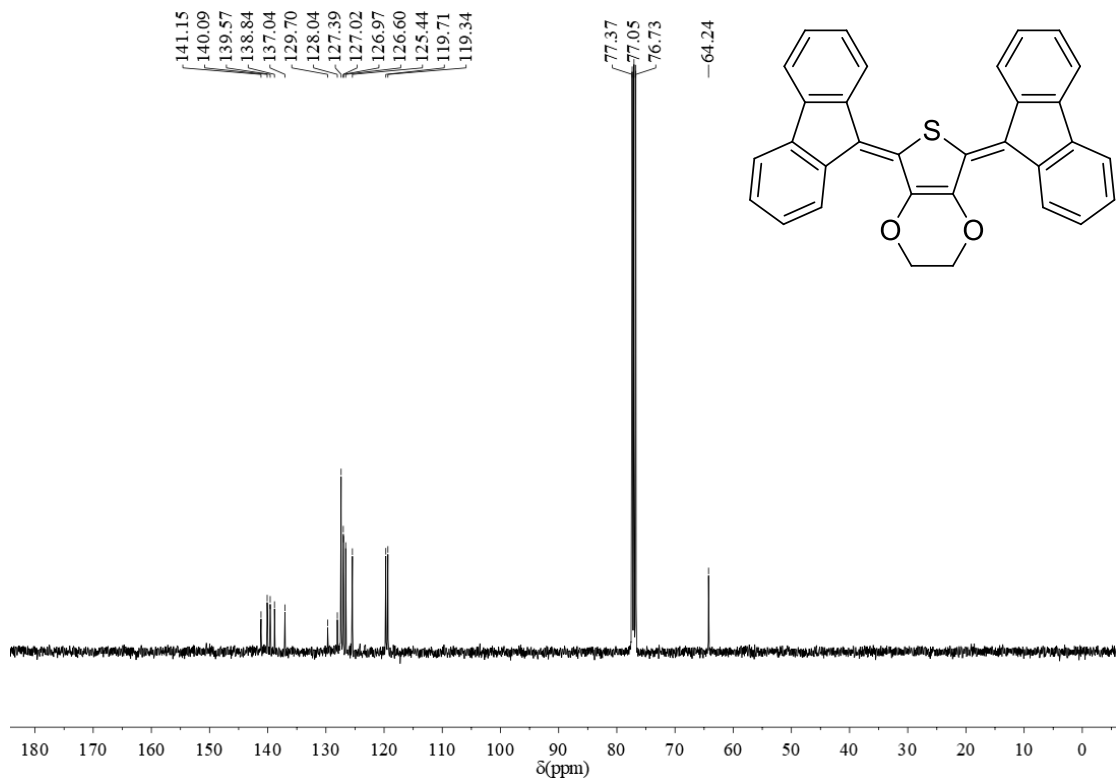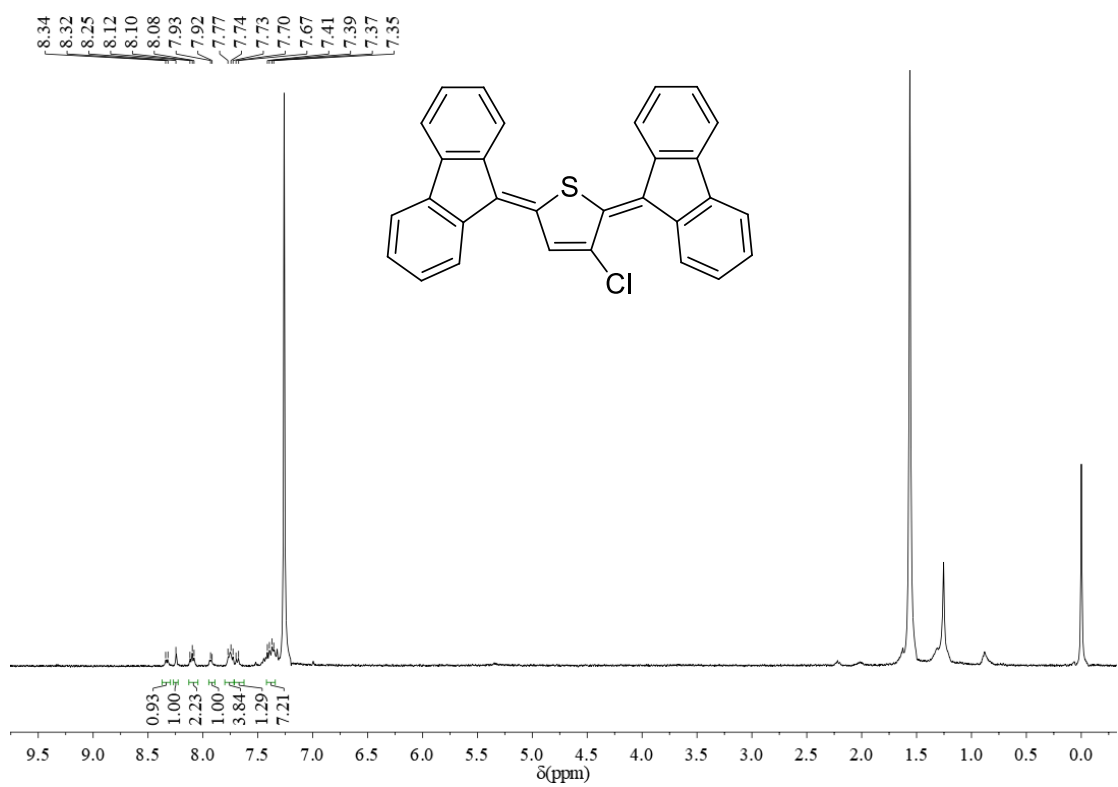

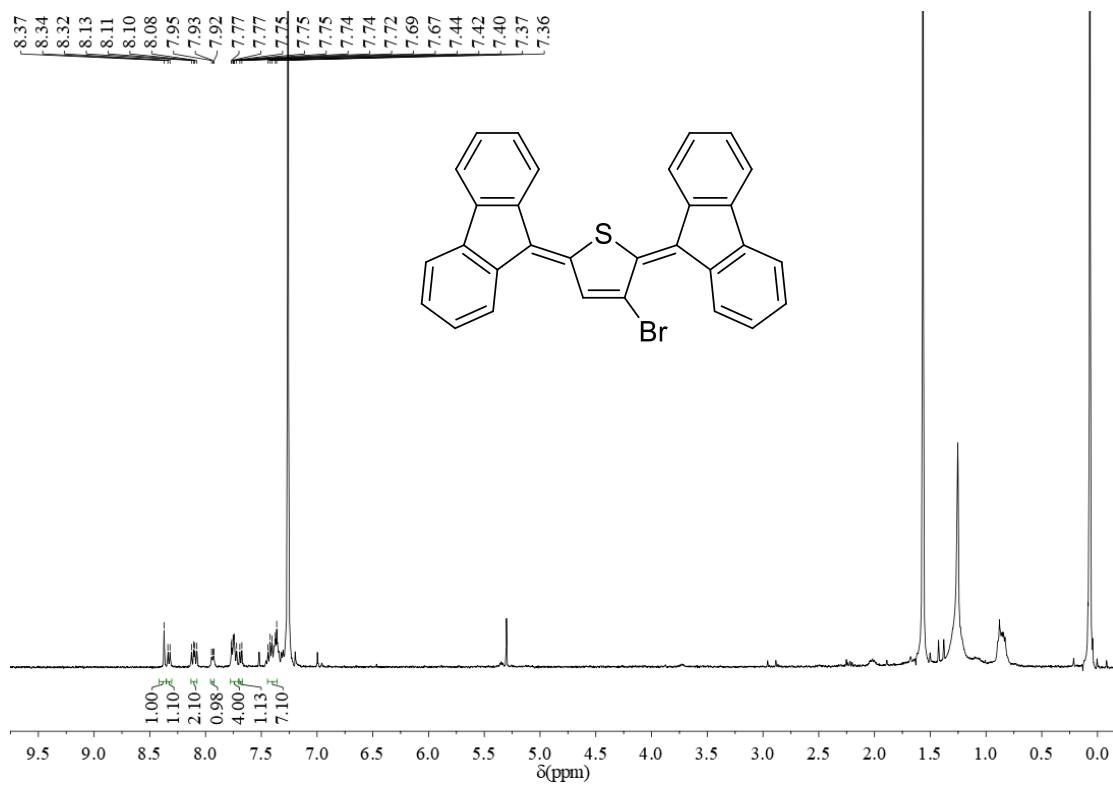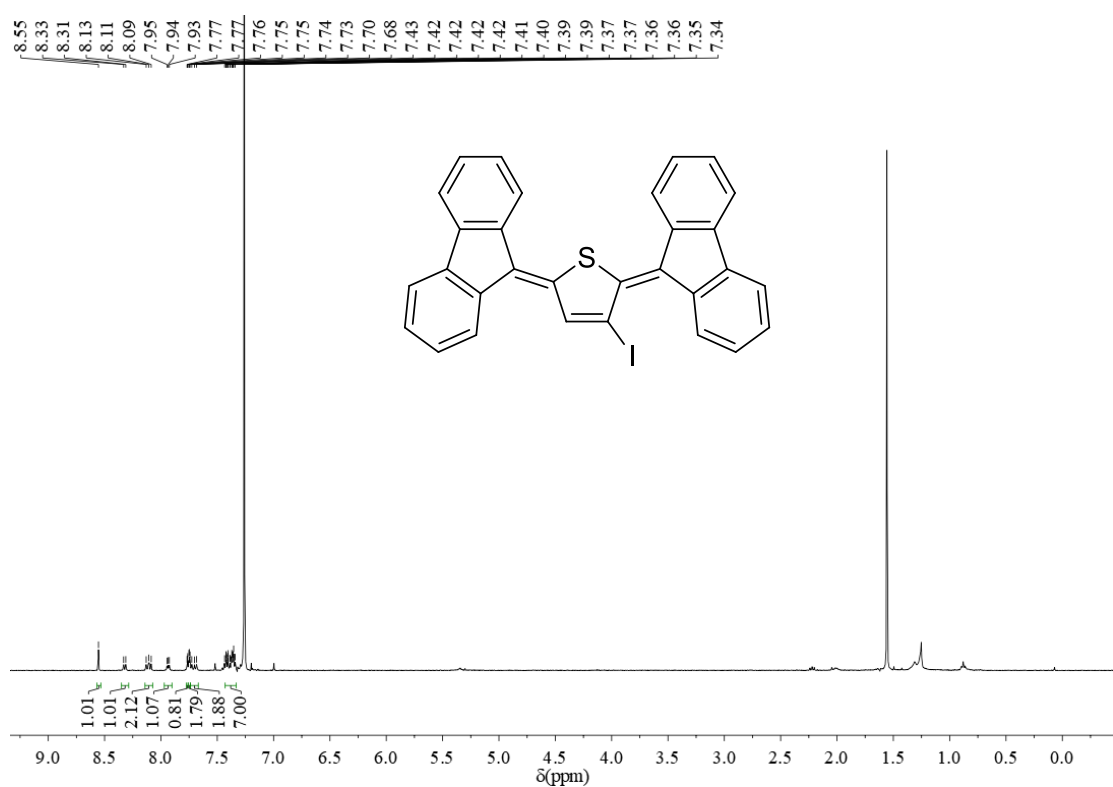

Supplement: d2nj00008c1.pdf [file d2nj00008c1.pdf]
